# Supplementary material for: Oxazoline derivatives tagged with tosylated amino acids as recyclable organocatalysts for enantioselective allylation of aldehydes
Source: Royal Society of Chemistry journal article supplement (doi:10.1039/c3ra47424k), 2014-01-01
Supplement: c3ra47424k.pdf [file c3ra47424k.pdf]

## Supplementary Information

### Oxazoline derivatives tagged with tosylated amino acids as recyclable organocatalysts for enantioselective allylation of aldehydes

Debashis Ghosh,<sup>a,b</sup> Arghya Sadhukhan,<sup>a,b</sup> Nabin Ch. Maity,<sup>a,b</sup> Sayed H. R. Abdi,<sup>\*a,b</sup> Noor-ul H. Khan,<sup>a,b</sup> Rukhsana I. Kureshy<sup>a,b</sup> and Hari C. Bajaj<sup>a,b</sup>

<sup>a</sup>Discipline of Inorganic Materials and Catalysis, Central Salt and Marine Chemicals Research Institute (CSMCRI), Council of Scientific & Industrial Research (CSIR), G. B. Marg, Bhavnagar-364 021, Gujarat, India. Fax: (+91) 0278-2566970. E-mail: [shrabdi@csmcri.org](mailto:shrabdi@csmcri.org)

<sup>b</sup>Academy of Scientific and Innovative Research, Central Salt and Marine Chemicals Research Institute (CSMCRI), Council of Scientific & Industrial Research (CSIR), G. B. Marg, Bhavnagar- 364 021, Gujarat, India

#### Content

|                                                                                    | Pages     |
|------------------------------------------------------------------------------------|-----------|
| General                                                                            | : S1-S2   |
| Characterization data for the homoallyl alcohols                                   | : S2-S6   |
| HPLC chromatogram of the products                                                  | : S7-S22  |
| Copy of <sup>1</sup> H and <sup>13</sup> C spectra of the catalysts                | : S23-S29 |
| Copy of <sup>1</sup> H, <sup>13</sup> C and Mass spectra of the recovered catalyst | : S30     |
| NMR experiments for mechanistic interpretation                                     | : S31-S33 |
| Copy of <sup>1</sup> H spectra of the reaction mixture with time                   | : S34-S37 |
| References                                                                         | : S38     |

#### General

Different aldehydes and reagents were used as received. All the solvents used in the present study were dried by known purification technique.<sup>1</sup> NMR spectra were obtained with a Bruker F113V spectrometer (500 MHz / 200 MHz) and are referenced internally with TMS. Splitting patterns were reported as s, singlet; d, doublet; dd, doublet of doublet; t, triplet; q, quartet; m, multiplet; br, broad. Enantiomeric excess (ee) were determined by HPLC using Daicel Chiralpak OD-H, AS-H, IA, IB and IC chiral columns with 2-propanol/hexane as eluent. FTIR spectra were carried out using KBr. Optical rotations were determined by

automatic polarimeter. For the product purification flash chromatography was performed using silica gel 100-200 mesh.

### Characterization data for the homoallyl alcohols

**(S)-1-phenylbut-3-en-1-ol (compound 2a):**<sup>2,3</sup> The product was isolated as a colorless oil (yield 55.2 mg, 75%) after purification by silica gel chromatography (Hexane/EtOAc = 95:5). Reaction time = 18 h. <sup>1</sup>H NMR (CDCl<sub>3</sub>, 200 MHz):  $\delta$  = 2.40-2.46 (m, 2H), 2.68 (br, 1H), 4.58 (t,  $J$  = 6.5 Hz, 1H), 5.03-5.12 (m, 2H), 5.63-7.83 (m, 1H), 7.27 (m, 5H); <sup>13</sup>C NMR (CDCl<sub>3</sub>, 50 MHz):  $\delta$  = 43.8, 73.3, 118.5, 125.8, 127.6, 128.4, 134.4, 143.8. HPLC (Daicel Chiralcel OD-H, hexanes/2-propanol = 95:5, flow rate = 0.4 mL/min,  $\lambda$  = 220 nm)  $t_{\text{major}}(S)$  = 20.8 min,  $t_{\text{minor}}(R)$  = 19.4 min.

**(S)-1-(4-methoxyphenyl)but-3-en-1-ol (compound 2b):**<sup>2,3</sup> The product was isolated as a yellowish oil (yield 62.5 mg, 70%) after purification by silica gel chromatography (Hexane/EtOAc = 92:8). Reaction time = 24 h. <sup>1</sup>H NMR (CDCl<sub>3</sub>, 500 MHz):  $\delta$  = 2 (br, 1H), 2.49 (t,  $J$  = 6.5 Hz, 2H), 3.81 (s, 3H), 4.68 (t,  $J$  = 6.5 Hz, 1H), 5.12-5.18 (m, 2H), 5.76-5.84 (m, 1H), 6.87-6.89 (m, 2H), 7.26-7.29 (m, 2H); <sup>13</sup>C NMR (CDCl<sub>3</sub>, 50 MHz):  $\delta$  = 43.7, 55.2, 73.3, 113.7, 118.2, 127, 134.6, 136.3, 159. Optical Rotation:  $[\alpha]_{\text{D}}^{27}$  = -65 ( $c$  1.0, CHCl<sub>3</sub>).<sup>2</sup> HPLC (Daicel Chiralcel OD-H, hexanes/2-propanol = 95:5, flow rate = 0.8 mL/min,  $\lambda$  = 230 nm)  $t_{\text{major}}(S)$  = 13.8 min,  $t_{\text{minor}}(R)$  = 12.2 min.

**(4-benzyloxyphenyl)but-3-en-1-ol (compound 2c):**<sup>2</sup> The product was isolated as a colorless oil (yield 86.3 mg, 65%) after purification by silica gel chromatography (Hexane/EtOAc = 90:10). Reaction time = 24 h. <sup>1</sup>H NMR (CDCl<sub>3</sub>, 500 MHz):  $\delta$  = 1.99 (br, 1H), 2.49 (t,  $J$  = 6.5 Hz, 2H), 4.68 (t,  $J$  = 6 Hz, 1H), 5.06-5.17 (m, 4H), 5.76-5.84 (m, 1H), 6.95 (d,  $J$  = 8.5 Hz, 2H), 7.26-7.44 (m, 7H); <sup>13</sup>C NMR (CDCl<sub>3</sub>, 125 MHz):  $\delta$  = 43.7, 70, 72.9, 114.7, 118.3, 127.1, 127.4, 127.9, 128.5, 134.6, 136, 136.3, 158.2. Optical Rotation:  $[\alpha]_{\text{D}}^{27}$  = -55 ( $c$  1.0, CHCl<sub>3</sub>).<sup>2</sup> HPLC (Daicel Chiralpak IC column, hexanes/2-propanol = 97:3, flow rate = 0.8 mL/min,  $\lambda$  = 254 nm)  $t(\text{major})$  = 29.9 min,  $t(\text{minor})$  = 27.3 min.

**(S)-1-(4-tert-Butylphenyl)-3-buten-1-ol (compound 2d):**<sup>2,6</sup> The product was isolated as a colorless oil (yield 71 mg, 70%) after purification by silica gel chromatography (Hexane/EtOAc = 95:5). Reaction time = 24 h. <sup>1</sup>H NMR (CDCl<sub>3</sub>, 200 MHz):  $\delta$  = 1.28 (s, 9H),

2.44-2.48 (m, 3H), 2.63-2.64 (m, 1H), 5.06-5.13 (m, 2H), 5.72-5.82 (m, 1H), 7.23-7.33 (m, 4H).  $^{13}\text{C}$  NMR ( $\text{CDCl}_3$ , 50 MHz):  $\delta = 31, 34.3, 43.3, 72.8, 117.6, 125, 125.3, 134.6, 140.7, 150.2$  Optical Rotation:  $[\alpha]_{\text{D}}^{27} = -39$  ( $c$  1,  $\text{Et}_2\text{O}$ ).<sup>2</sup> HPLC (Daicel Chiralpak IA, hexanes/2-propanol = 96:4, flow rate = 0.5 mL/min,  $\lambda = 254$  nm)  $t_{\text{major}}(S) = 15.4$  min,  $t_{\text{minor}}(R) = 13$  min.

**(S)-1-(*p*-tolyl)but-3-en-1-ol (compound 2e):**<sup>2,3</sup> The product was isolated as a colorless oil (yield 52.5 mg, 65%) after purification by silica gel chromatography (Hexane/EtOAc = 96:4). Reaction time = 24 h.  $^1\text{H}$  NMR ( $\text{CDCl}_3$ , 500 MHz):  $\delta = 2.07$  (br, 1H), 2.34 (s, 3H), 2.49-2.51 (m, 2H), 4.68 (t,  $J = 6.5$  Hz, 1H), 5.11-5.17 (m, 2H), 5.76-5.84 (m, 1H), 7.15-7.25 (m, 4H);  $^{13}\text{C}$  NMR ( $\text{CDCl}_3$ , 125 MHz):  $\delta = 21.1, 43.7, 73.2, 118.2, 125.7, 129.1, 134.6, 140.9$ . Optical Rotation:  $[\alpha]_{\text{D}}^{27} = -50$  ( $c$  1,  $\text{CHCl}_3$ ).<sup>2</sup> HPLC (Daicel Chiralcel OD-H, hexanes/2-propanol = 99:1, flow rate = 0.5 mL/min,  $\lambda = 220$  nm)  $t_{\text{major}}(S) = 34.1$  min,  $t_{\text{minor}}(R) = 31.8$  min.

**(S)-1-(4-nitrophenyl)but-3-en-1-ol (compound 2f):**<sup>2,4</sup> The product was isolated as a yellow oil (yield 67.5 mg, 70%) after purification by silica gel chromatography (Hexane/EtOAc = 90:10). Reaction time = 20 h.  $^1\text{H}$  NMR ( $\text{CDCl}_3$ , 500 MHz):  $\delta = 2.17$  (br, 1H), 2.43-2.49 (m, 1H), 2.54-2.59 (m, 1H), 4.86-4.89 (m, 1H), 5.18-5.22 (m, 2H), 5.75-5.83 (m, 1H), 7.53 (d,  $J = 8.5$  Hz, 2H), 8.21 (d,  $J = 8.5$  Hz, 2H);  $^{13}\text{C}$  NMR ( $\text{CDCl}_3$ , 50 MHz):  $\delta = 43.9, 72.1, 119.7, 123.6, 126.6, 133.2, 151.1$ . Optical Rotation:  $[\alpha]_{\text{D}}^{27} = -60$  ( $c$  1.0,  $\text{CHCl}_3$ ).<sup>2,4</sup> HPLC (Daicel Chiralpak IA, hexanes/2-propanol = 99:1, flow rate = 1 mL/min,  $\lambda = 220$  nm)  $t_{\text{major}}(S) = 67.8$  min,  $t_{\text{minor}}(R) = 62.7$  min.

**(S)-1-(4-fluorophenyl)but-3-en-1-ol (compound 2g):**<sup>2</sup> The product was isolated as a colorless oil (yield 64 mg, 78%) after purification by silica gel chromatography (Hexane/EtOAc = 92:8). Reaction time = 22 h.  $^1\text{H}$  NMR ( $\text{CDCl}_3$ , 500 MHz):  $\delta = 2.03$ -2.04 (br, 1H), 2.44-2.54 (m, 2H), 4.71-4.74 (m, 1H), 5.14-5.18 (m, 2H), 5.75-5.83 (m, 1H), 7.01 (t,  $J = 8.5$  Hz, 2H), 7.31-7.34 (m, 2H);  $^{13}\text{C}$  NMR ( $\text{CDCl}_3$ , 125 MHz):  $\delta = 43.9, 72.6, 115.1, 115.3, 118.7, 127.4, 134.2$ . Optical Rotation:  $[\alpha]_{\text{D}}^{27} = -49.1$  ( $c$  1.0,  $\text{CHCl}_3$ ).<sup>2</sup> HPLC (Daicel Chiralpak AS-H, hexanes/2-propanol = 99:1, flow rate = 0.8 mL/min,  $\lambda = 220$  nm)  $t_{\text{major}}(S) = 21.2$  min,  $t_{\text{minor}}(R) = 19.7$  min.

**(S)-1-[(4-Trifluoromethyl)-phenyl]-but-3-en-1-ol (compound 2h):**<sup>5</sup> The product was isolated as a colorless oil (yield 81 mg, 75%) after purification by silica gel chromatography (Hexane/EtOAc = 90:10). Reaction time = 20 h.  $^1\text{H}$  NMR ( $\text{CDCl}_3$ , 200 MHz):  $\delta = 2.16$  (s, 1H), 2.38-2.59 (m, 2H), 4.78 (t,  $J = 6.6$  Hz, 1H), 5.15-5.22 (m, 2H), 5.69-5.90 (m, 1H), 7.46-

7.63 (m, 4H);  $^{13}\text{C}$  NMR ( $\text{CDCl}_3$ , 50 MHz):  $\delta = 43.8, 72.5, 119.2, 125.3, 125.4, 126, 133.6, 147.7$ .  $[\alpha]_{\text{D}}^{27} = -30.1$  ( $c$  1.0,  $\text{CHCl}_3$ ).<sup>5</sup> HPLC (Daicel Chiralpak IA, hexanes/2-propanol = 98:2, flow rate = 0.6 mL/min,  $\lambda = 220$  nm)  $t_{\text{major}}(S) = 20.4$  min,  $t_{\text{minor}}(R) = 19$  min.

**(S)-1-(3-methoxyphenyl)but-3-en-1-ol (compound 2i):**<sup>2,4</sup> The product was isolated as a slight yellowish oil (yield 68.6 mg, 77%) after purification by silica gel chromatography (Hexane/EtOAc = 94:6). Reaction time = 20 h.  $^1\text{H}$  NMR ( $\text{CDCl}_3$ , 500 MHz):  $\delta = 2.02\text{--}2.03$  (br, 1H), 2.44-2.55 (m, 2H), 3.80 (s, 3H), 4.7-4.72 (m, 1H), 5.12-5.18 (m, 2H), 5.76-5.84 (m, 1H), 6.79 (dd,  $J = 2.5, 5.5$  Hz, 1H), 6.91-6.93 (m, 2H), 7.23-7.27 (m, 1H).  $^{13}\text{C}$  NMR ( $\text{CDCl}_3$ , 125 MHz):  $\delta = 43.8, 55.2, 73.2, 111.3, 113, 118.1, 118.4, 129.4, 134.4, 145.6, 159.7$ . Optical Rotation:  $[\alpha]_{\text{D}}^{27} = -59$  ( $c$  0.9,  $\text{C}_6\text{H}_6$ ).<sup>2</sup> HPLC (Daicel Chiralpak IA, hexanes/2-propanol = 99:1, flow rate = 0.8 mL/min,  $\lambda = 220$  nm)  $t_{\text{major}}(S) = 21.4$  min,  $t_{\text{minor}}(R) = 19.9$  min.

**(S)-1-(2-methoxyphenyl)but-3-en-1-ol (compound 2j):**<sup>2,3</sup> The product was isolated as a colorless oil (yield 74.8 mg, 84%) after purification by silica gel chromatography (Hexane/EtOAc = 95:5). Reaction time = 20 h.  $^1\text{H}$  NMR ( $\text{CDCl}_3$ , 500 MHz):  $\delta = 2.47\text{--}2.53$  (m, 1H), 2.56-2.62 (m, 2H), 3.85 (s, 3H), 4.94-4.98 (m, 1H), 5.09-5.15 (m, 2H), 5.81-5.89 (m, 1H), 6.87 (d,  $J = 8$  Hz, 1H), 6.95 (t,  $J = 7.5$  Hz, 1H), 7.22-7.26 (m, 1H), 7.33-7.34 (m, 1H);  $^{13}\text{C}$  NMR ( $\text{CDCl}_3$ , 125 MHz):  $\delta = 41.8, 55.2, 69.7, 110.4, 117.6, 120.6, 126.8, 128.3, 131.7, 135.2, 156.3$ . Optical Rotation:  $[\alpha]_{\text{D}}^{27} = -60.5$  ( $c$  1.0,  $\text{C}_6\text{H}_6$ ).<sup>2</sup> HPLC (Daicel Chiralcel OD-H, hexanes/2-propanol = 97:3, flow rate = 0.6 mL/min,  $\lambda = 230$  nm)  $t_{\text{major}}(S) = 19.2$  min,  $t_{\text{minor}}(R) = 21.2$  min.

**(S)-1-(2-fluorophenyl)but-3-en-1-ol (compound 2k):**<sup>2,5</sup> The product was isolated as a colorless oil (yield 61 mg, 68%) after purification by silica gel chromatography (Hexane/EtOAc = 96:4). Reaction time = 22 h.  $^1\text{H}$  NMR ( $\text{CDCl}_3$ , 500 MHz):  $\delta = 2.16\text{--}2.17$  (d,  $J = 4$  Hz, 1H), 2.46-2.61 (m, 2H), 5.05-5.08 (m, 1H), 5.14-5.18 (m, 2H), 5.78-5.85 (m, 1H), 7.00-7.03 (m, 1H), 7.14 (d,  $J = 7.5$  Hz, 1H), 7.23-7.27 (m, 1H), 7.46-7.49 (m, 1H).  $^{13}\text{C}$  NMR ( $\text{CDCl}_3$ , 50 MHz):  $\delta = 42.5, 67.2, 114.9, 115.4, 118.6, 124.1, 124.2, 127.2, 128.7, 128.9, 130.6, 134, 157.2$ . Optical Rotation:  $[\alpha]_{\text{D}}^{27} = -38.2$  ( $c$  1.5,  $\text{CHCl}_3$ ).<sup>2,5</sup> HPLC (Daicel Chiralpak AS-H, hexanes/2-propanol = 99.5:0.5, flow rate = 0.5 mL/min,  $\lambda = 254$  nm)  $t_{\text{major}}(S) = 34.6$  min,  $t_{\text{minor}}(R) = 32.7$  min.

**(S)-1-(naphthalen-2-yl)but-3-en-1-ol (compound 2l):**<sup>2,3</sup> The product was isolated as a pale yellow oil (yield 83.7 mg, 85%) after purification by silica gel chromatography (Hexane/EtOAc = 90:10). Reaction time = 14 h.  $^1\text{H}$  NMR ( $\text{CDCl}_3$ , 500 MHz):  $\delta = 2.14\text{--}2.15$

(d,  $J = 4$  Hz, 1H), 2.55-2.66 (m, 2H), 4.9-4.93 (m, 1H), 5.15-5.21 (m, 2H), 5.79-5.88 (m, 1H), 7.45-7.49 (m, 3H), 7.81-7.85 (m, 4H).  $^{13}\text{C}$  NMR ( $\text{CDCl}_3$ , 125 MHz):  $\delta = 43.7, 73.4, 118.6, 123.9, 124.5, 125.8, 126.1, 127.7, 127.9, 128.2, 134.3, 141.2$ . Optical Rotation:  $[\alpha]_{\text{D}}^{27} = -54$  ( $c$  1,  $\text{CHCl}_3$ ).<sup>2</sup> HPLC (Daicel Chiralpak IA, hexanes/2-propanol = 90:10, flow rate = 0.5 mL/min,  $\lambda = 254$  nm)  $t_{\text{major}}(S) = 18.7$  min,  $t_{\text{minor}}(R) = 16.6$  min.

**(S)-1-(thiophen-2-yl)but-3-en-1-ol (compound 2m):**<sup>2,5</sup> The product was isolated as a yellow oil (yield 62.7 mg, 82%) after purification by silica gel chromatography (Hexane/EtOAc = 94:6). Reaction time = 14 h.  $^1\text{H}$  NMR ( $\text{CDCl}_3$ , 500 MHz):  $\delta = 2.19$  (d,  $J = 4$  Hz, 1H), 2.6-2.65 (m, 2H), 4.98-5.01 (m, 1H), 5.15-5.22 (m, 2H), 5.79-5.88 (m, 1H), 6.96-6.99 (m, 2H), 7.24-7.26 (m, 1H).  $^{13}\text{C}$  NMR ( $\text{CDCl}_3$ , 125 MHz):  $\delta = 43.6, 69.3, 118.8, 123.6, 124.5, 126.6, 133.8$ . HPLC (Daicel Chiralcel OD-H, hexanes/2-propanol = 97:3, flow rate = 0.6 mL/min,  $\lambda = 220$  nm)  $t_{\text{major}}(S) = 17.3$  min,  $t_{\text{minor}}(R) = 15.9$  min.

**(1E,3R)-1-phenyl-1,5-hexadiene-3-ol (compound 2n):**<sup>2,4</sup> The product was isolated as a yellow oil (yield 66 mg, 77%) after purification by silica gel chromatography (Hexane/EtOAc = 90:10). Reaction time = 15 h.  $^1\text{H}$  NMR ( $\text{CDCl}_3$ , 500 MHz):  $\delta = 2.36$ -2.47 (m, 2H), 4.34-4.38 (m, 1H), 5.16-5.21 (m, 2H), 5.82-5.90 (m, 1H), 6.22-6.27 (m, 1H), 6.59 (d,  $J = 15.5$  Hz, 1H), 7.23-7.26 (m, 1H), 7.3 (t,  $J = 8$  Hz, 2H), 7.37 (d,  $J = 7$  Hz, 1H).  $^{13}\text{C}$  NMR ( $\text{CDCl}_3$ , 125 MHz):  $\delta = 41.9, 71.7, 118.5, 126.4, 127.6, 128.5, 130.3, 131.5, 134, 136.6$ . Optical Rotation:  $[\alpha]_{\text{D}}^{27} = +31$  ( $c$  1,  $\text{CHCl}_3$ ).<sup>2</sup> HPLC (Daicel Chiralpak IA, hexanes/2-propanol = 95:5, flow rate = 0.7 mL/min,  $\lambda = 254$  nm)  $t_{\text{major}}(R) = 14$  min,  $t_{\text{minor}}(S) = 15.9$  min.

**(1E,3R)-2-Methyl-1-phenyl-1,5-hexadiene-3-ol (compound 2o):**<sup>2,6</sup> The product was isolated as a yellow oil (yield 84 mg, 87%) after purification by silica gel chromatography (Hexane/EtOAc = 90:10). Reaction time = 15 h.  $^1\text{H}$  NMR ( $\text{CDCl}_3$ , 200 MHz):  $\delta = 1.83$ -1.84 (m, 1H), 1.88 (s, 3H), 2.38-2.44 (m, 2H), 4.22 (m, 1H), 5.13-5.22 (m, 2H), 5.74-5.95 (m, 1H), 6.53 (s, 1H), 7.21-7.33 (m, 5H).  $^{13}\text{C}$  NMR ( $\text{CDCl}_3$ , 50 MHz):  $\delta = 13.7, 40.1, 76.5, 118, 125.7, 126.4, 128.1, 128.9, 134.5, 137.5, 139.5$ . Optical Rotation:  $[\alpha]_{\text{D}}^{27} = +6.5$  ( $c$  0.9,  $\text{CHCl}_3$ ).<sup>2,6</sup> HPLC (Daicel Chiralcel IC, hexanes/2-propanol = 96:4, flow rate = 0.8 mL/min,  $\lambda = 220$  nm)  $t_{\text{major}}(R) = 9.55$  min,  $t_{\text{minor}}(S) = 7.1$  min.

**(R)-1-phenylpent-4-en-2-ol (compound 2p):**<sup>4</sup> The product was isolated as a slight yellowish oil (42.5 mg, 52%) after purification by silica gel chromatography (Hexane/EtOAc = 92:8). Reaction time = 24 h.  $^1\text{H}$  NMR ( $\text{CDCl}_3$ , 500 MHz):  $\delta = 2.2$ -2.26 (m, 1H), 2.32-2.37 (m, 1H),

2.71 (dd,  $J = 8, 13.5$  Hz, 1H), 2.80 (dd,  $J = 5, 13.5$  Hz, 1H), 3.86-3.91 (m, 1H), 5.14-5.18 (m, 2H), 5.82-5.91 (m, 1H), 7.22-7.25 (m, 3H), 7.3 (t,  $J = 7.5$  Hz);  $^{13}\text{C}$  NMR ( $\text{CDCl}_3$ , 125 MHz):  $\delta = 42.6, 44.7, 73.1, 119.6, 126.9, 127.9, 130, 130.8, 136.1$ . Optical Rotation:  $[\alpha]_{\text{D}}^{27} = -5.5$  ( $c$  0.8,  $\text{CHCl}_3$ ).<sup>6</sup> HPLC (Daicel Chiralcel ODH, hexanes/2-propanol = 97:3, flow rate = 0.5 mL/min,  $\lambda = 220$  nm)  $t_{\text{major}}(S) = 22.9$  min,  $t_{\text{minor}}(R) = 18.5$  min.

## HPLC chromatogram of the products

### (S)-1-phenylbut-3-en-1-ol (compound 2a)

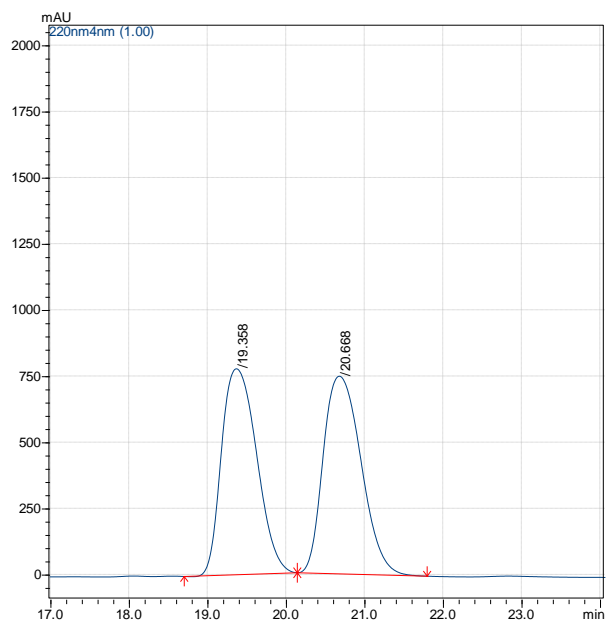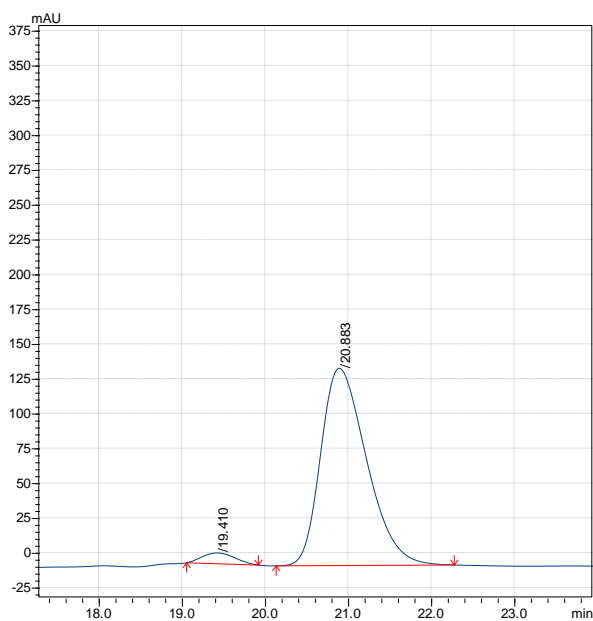

| Peak# | Ret. Time | Area     | Peak Start | Peak End | Area%   |
|-------|-----------|----------|------------|----------|---------|
| 1     | 19.358    | 24273299 | 18.699     | 20.139   | 49.1845 |
| 2     | 20.668    | 25078259 | 20.139     | 21.792   | 50.8155 |

| Peak# | Ret. Time | Area    | Peak Start | Peak End | Area%   |
|-------|-----------|---------|------------|----------|---------|
| 1     | 19.410    | 211395  | 19.051     | 19.915   | 3.7428  |
| 2     | 20.883    | 5436612 | 20.128     | 22.272   | 96.2572 |

**(S)-1-(4-methoxyphenyl)but-3-en-1-ol (compound 2b)**

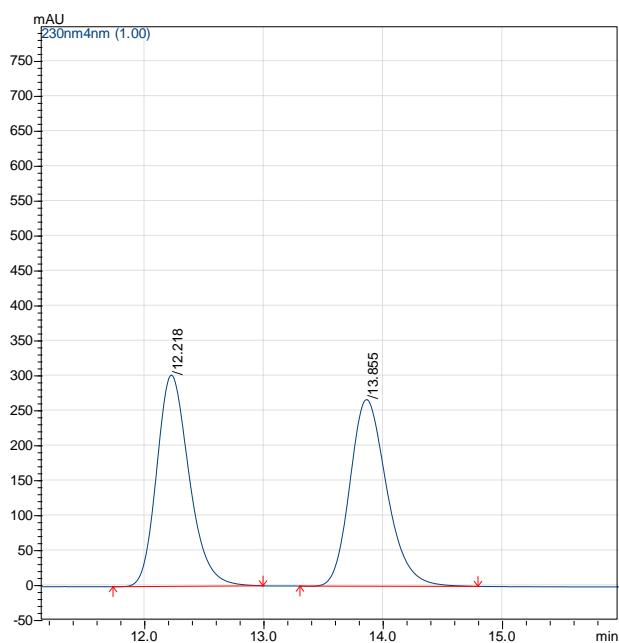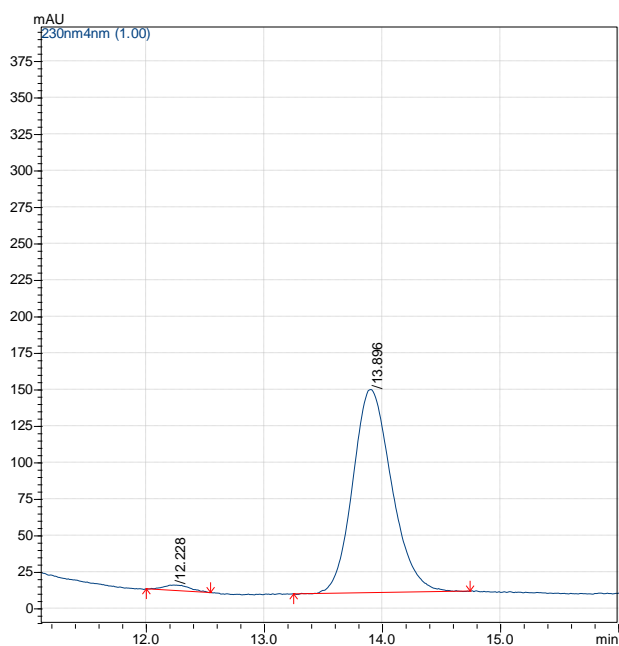

| Peak# | Ret. Time | Area    | Peak Start | Peak End | Area%   |
|-------|-----------|---------|------------|----------|---------|
| 1     | 12.218    | 5725276 | 11.733     | 12.992   | 49.9539 |
| 2     | 13.855    | 5735843 | 13.301     | 14.795   | 50.0461 |

| Peak# | Ret. Time | Area    | Peak Start | Peak End | Area%   |
|-------|-----------|---------|------------|----------|---------|
| 1     | 12.228    | 57188   | 12.000     | 12.544   | 1.7656  |
| 2     | 13.896    | 3181867 | 13.248     | 14.741   | 98.2344 |



**(4-benzyloxyphenyl)but-3-en-1-ol (compound 2c)**

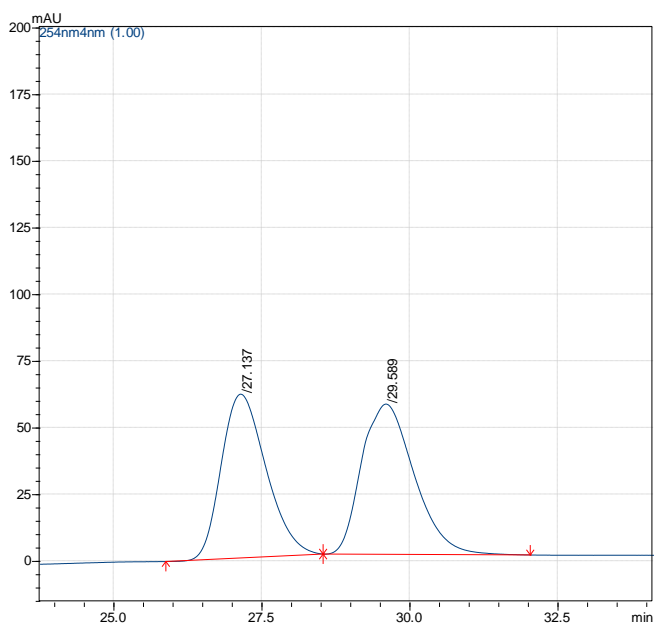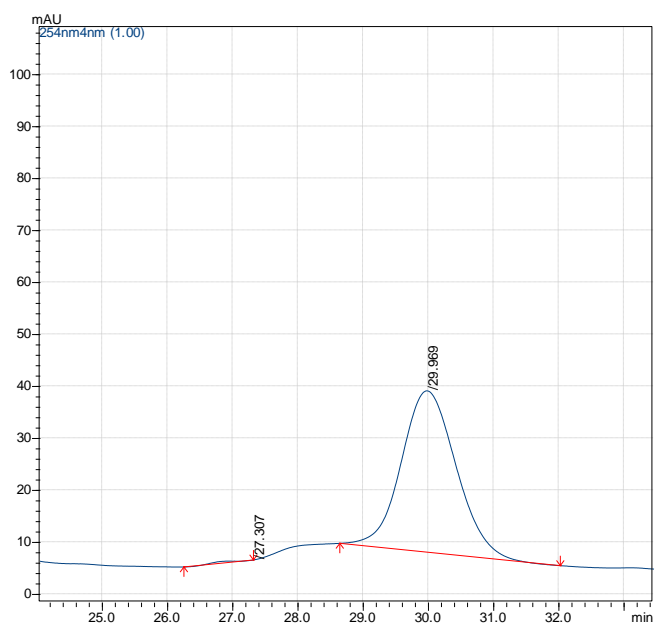

| Peak# | Ret. Time | Area    | Peak Start | Peak End | Area%   |
|-------|-----------|---------|------------|----------|---------|
| 1     | 27.137    | 3220583 | 25.877     | 28.533   | 48.0708 |
| 2     | 29.589    | 3479089 | 28.533     | 32.032   | 51.9292 |

| Peak# | Ret. Time | Area    | Peak Start | Peak End | Area%   |
|-------|-----------|---------|------------|----------|---------|
| 1     | 27.307    | 6450    | 26.251     | 27.317   | 0.3538  |
| 2     | 29.969    | 1816753 | 28.640     | 32.021   | 99.6462 |

**(S)-1-(4-*tert*-Butylphenyl)-3-buten-1-ol (compound 2d)**

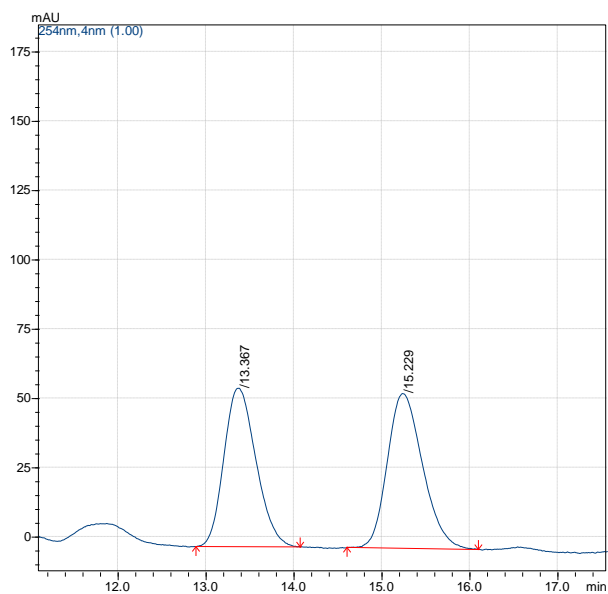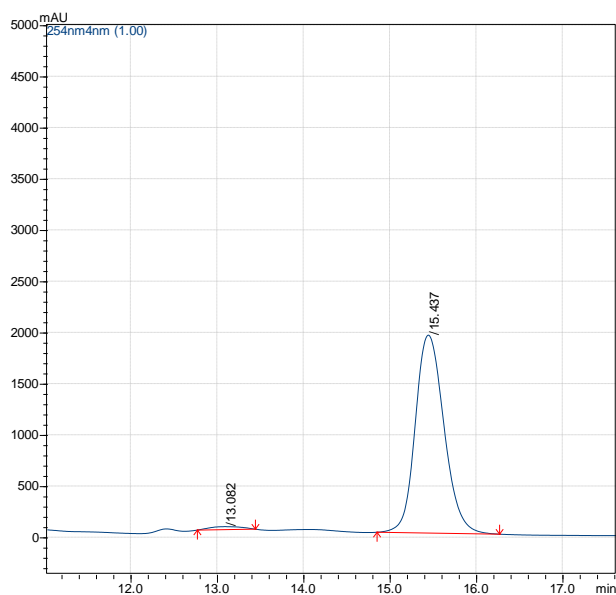

| Peak# | Ret. Time | Area    | Peak Start | Peak End | Area%   |
|-------|-----------|---------|------------|----------|---------|
| 1     | 13.367    | 1449416 | 12.885     | 14.069   | 48.1955 |
| 2     | 15.229    | 1557951 | 14.603     | 16.096   | 51.8045 |

| Peak# | Ret. Time | Area     | Peak Start | Peak End | Area%   |
|-------|-----------|----------|------------|----------|---------|
| 1     | 13.082    | 773546   | 12.768     | 13.440   | 1.7000  |
| 2     | 15.437    | 44728219 | 14.848     | 16.267   | 98.3000 |

**(S)-1-(*p*-tolyl)but-3-en-1-ol (compound 2e)**

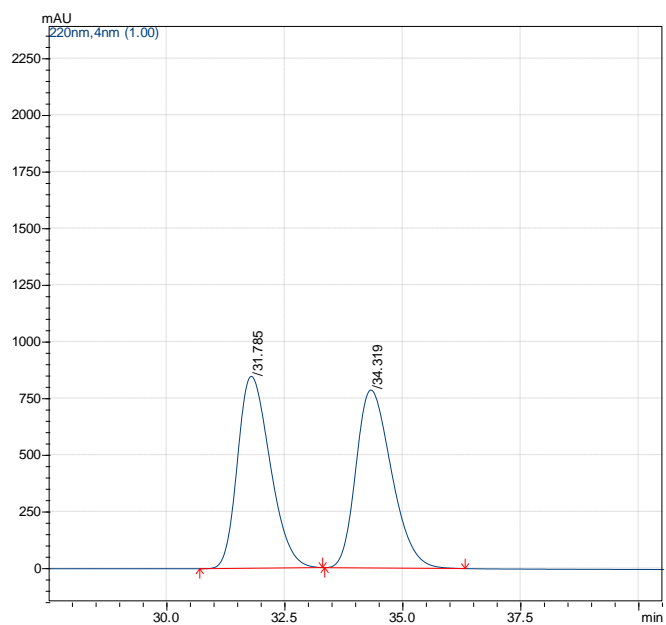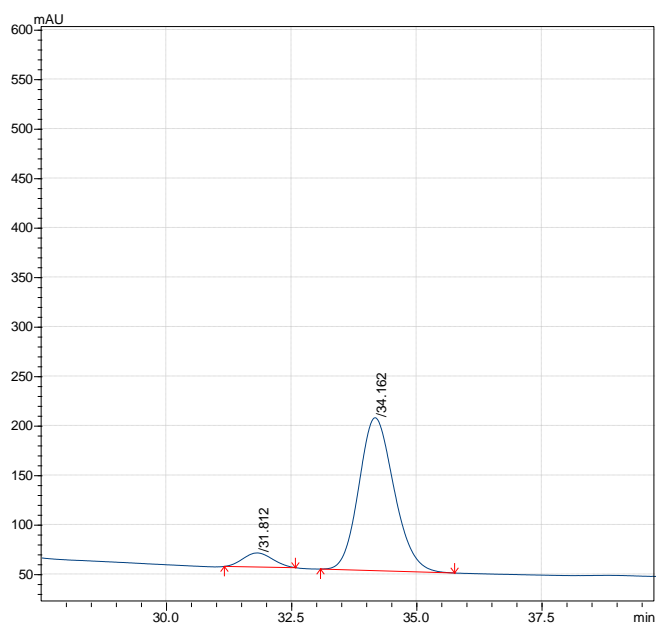

| Peak# | Ret. Time | Area     | Peak Start | Peak End | Area%   |
|-------|-----------|----------|------------|----------|---------|
| 1     | 31.785    | 40727300 | 30.699     | 33.301   | 49.7284 |
| 2     | 34.319    | 41172171 | 33.344     | 36.320   | 50.2716 |

| Peak# | Ret. Time | Area    | Peak Start | Peak End | Area%   |
|-------|-----------|---------|------------|----------|---------|
| 1     | 31.812    | 580450  | 31.157     | 32.576   | 7.1428  |
| 2     | 34.162    | 7545917 | 33.077     | 35.755   | 92.8572 |

**(S)-1-(4-nitrophenyl)but-3-en-1-ol (compound 2f)**

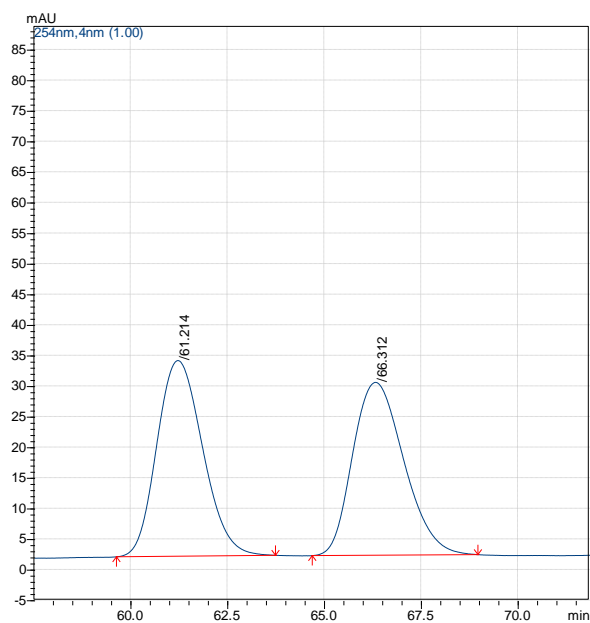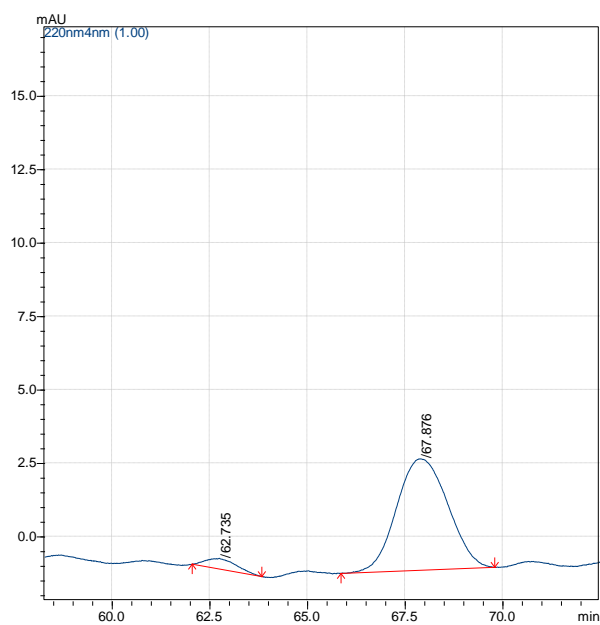

| Peak# | Ret. Time | Area    | Peak Start | Peak End | Area%   |
|-------|-----------|---------|------------|----------|---------|
| 1     | 61.214    | 2628470 | 59.627     | 63.733   | 50.3217 |
| 2     | 66.312    | 2594866 | 64.683     | 68.960   | 49.6783 |

| Peak# | Ret. Time | Area   | Peak Start | Peak End | Area%   |
|-------|-----------|--------|------------|----------|---------|
| 1     | 62.735    | 19632  | 62.048     | 63.829   | 5.3661  |
| 2     | 67.876    | 346227 | 65.856     | 69.792   | 94.6339 |

**(S)-1-(4-fluorophenyl)but-3-en-1-ol (compound 2g)**

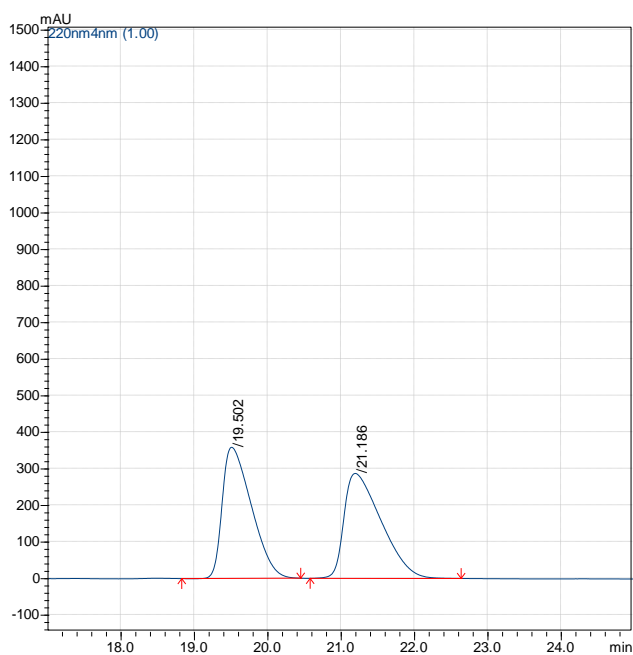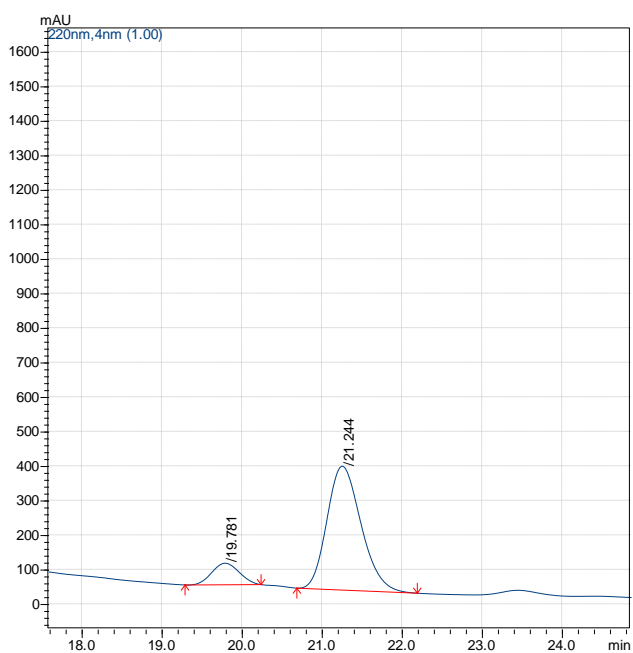

| Peak# | Ret. Time | Area     | Peak Start | Peak End | Area%   |
|-------|-----------|----------|------------|----------|---------|
| 1     | 19.502    | 9901810  | 18.827     | 20.448   | 49.5459 |
| 2     | 21.186    | 10083326 | 20.576     | 22.635   | 50.4541 |

| Peak# | Ret. Time | Area     | Peak Start | Peak End | Area%   |
|-------|-----------|----------|------------|----------|---------|
| 1     | 19.781    | 1488495  | 19.285     | 20.235   | 12.2895 |
| 2     | 21.244    | 10623475 | 20.683     | 22.187   | 87.7105 |

**(S)-1-[(4-Trifluoromethyl)-phenyl]-but-3-en-1-ol (compound 2h)**

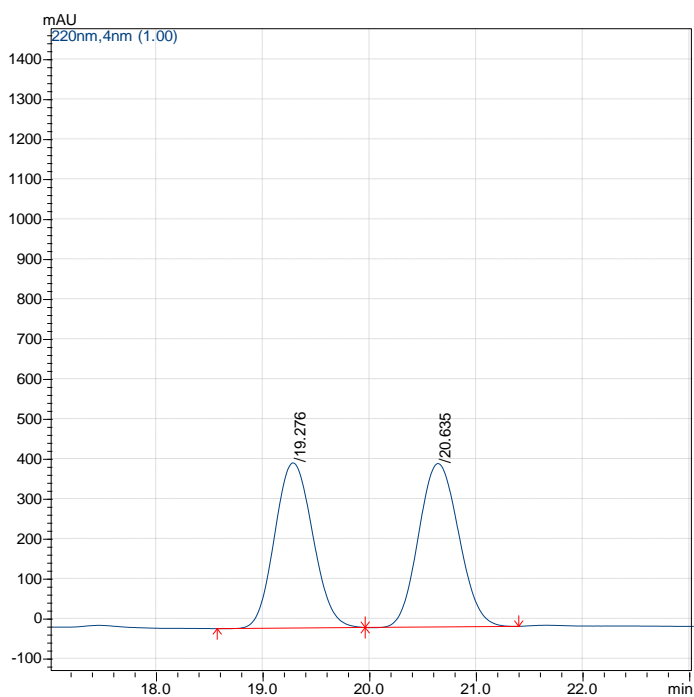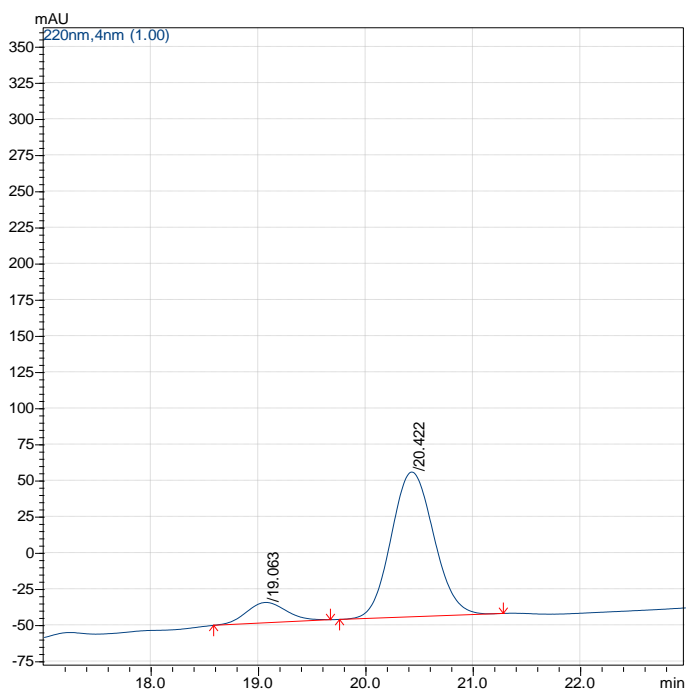

| Peak# | Ret. Time | Area     | Peak Start | Peak End | Area%   |
|-------|-----------|----------|------------|----------|---------|
| 1     | 19.276    | 10280751 | 18.571     | 19.957   | 48.9770 |
| 2     | 20.635    | 10710229 | 19.957     | 21.397   | 51.0230 |

| Peak# | Ret. Time | Area    | Peak Start | Peak End | Area%   |
|-------|-----------|---------|------------|----------|---------|
| 1     | 19.063    | 364839  | 18.581     | 19.669   | 11.6734 |
| 2     | 20.422    | 2760544 | 19.755     | 21.280   | 88.3266 |

**(S)-1-(3-methoxyphenyl)but-3-en-1-ol (compound 2i)**

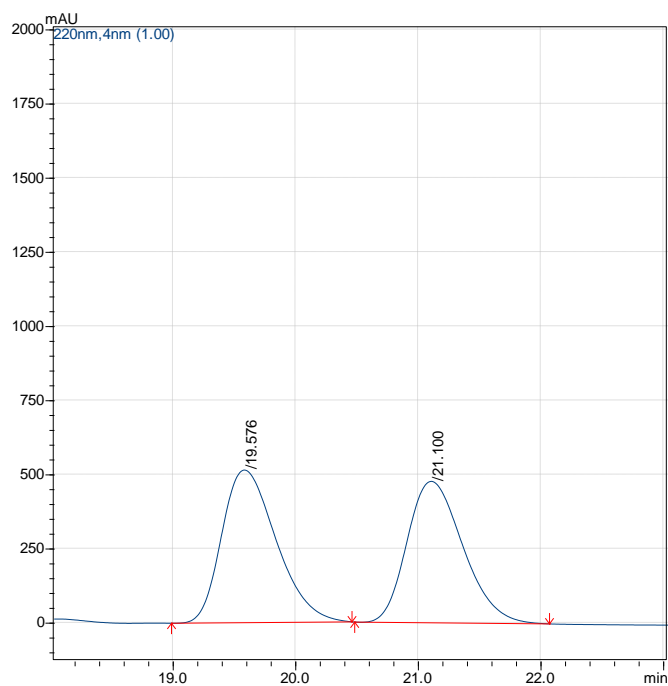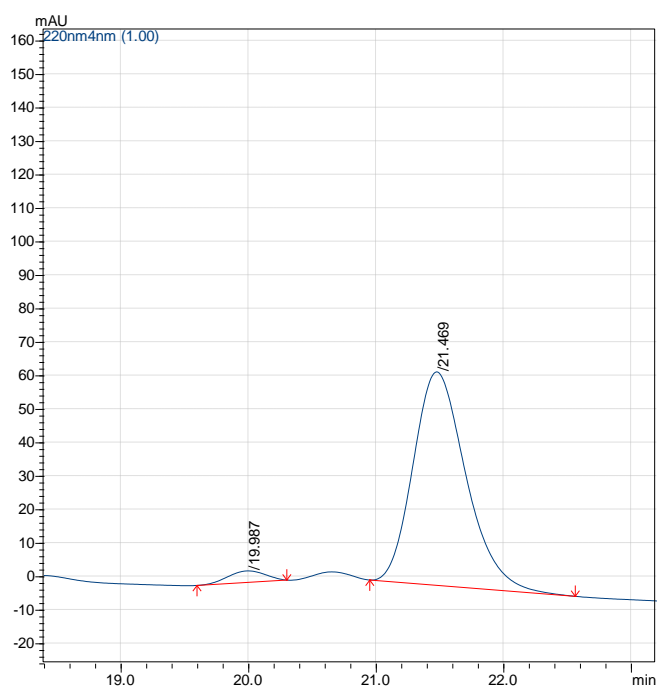

| Peak# | Ret. Time | Area     | Peak Start | Peak End | Area%   |
|-------|-----------|----------|------------|----------|---------|
| 1     | 19.576    | 15886416 | 18.987     | 20.459   | 51.2741 |
| 2     | 21.100    | 15096894 | 20.480     | 22.069   | 48.7259 |

| Peak# | Ret. Time | Area    | Peak Start | Peak End | Area%   |
|-------|-----------|---------|------------|----------|---------|
| 1     | 19.987    | 70409   | 19.595     | 20.299   | 3.6959  |
| 2     | 21.469    | 1834659 | 20.949     | 22.560   | 96.3041 |

**(S)-1-(2-methoxyphenyl)but-3-en-1-ol (compound 2j)**

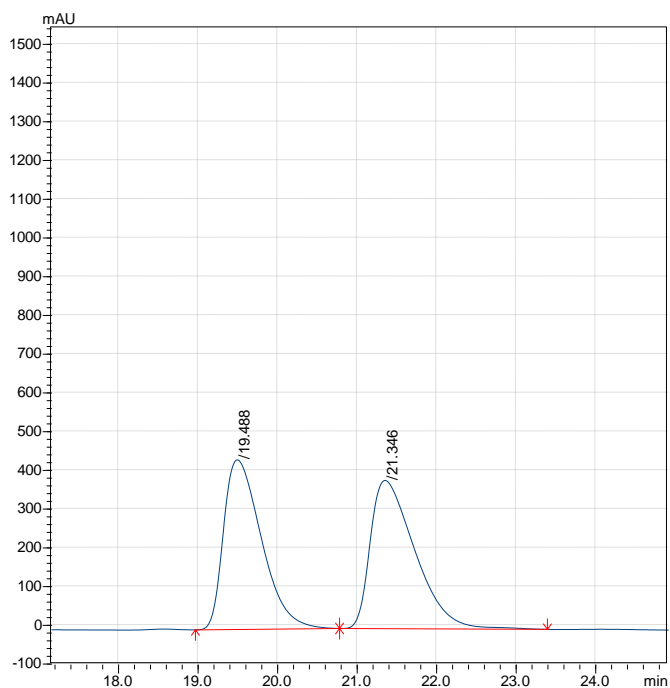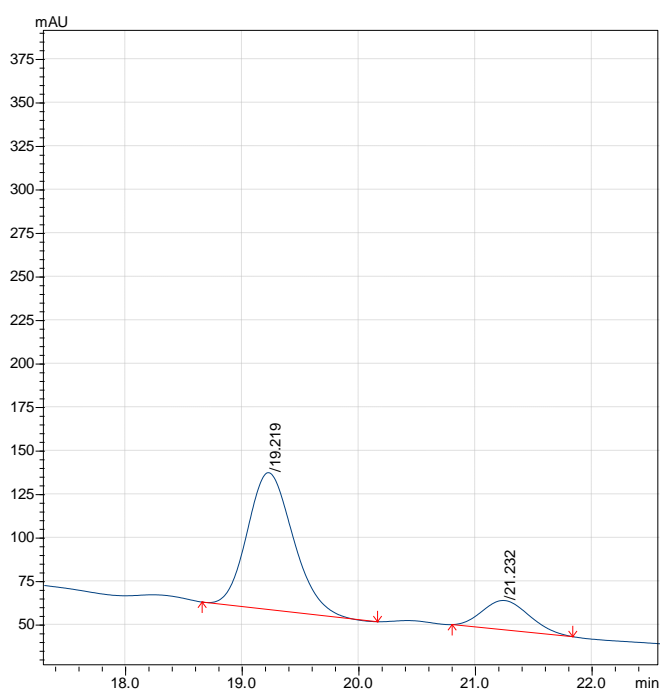

| Peak# | Ret. Time | Area     | Peak Start | Peak End | Area%   |
|-------|-----------|----------|------------|----------|---------|
| 1     | 19.488    | 14503807 | 18.965     | 20.779   | 49.2965 |
| 2     | 21.346    | 14917740 | 20.779     | 23.392   | 50.7035 |

| Peak# | Ret. Time | Area    | Peak Start | Peak End | Area%   |
|-------|-----------|---------|------------|----------|---------|
| 1     | 19.219    | 2147482 | 18.656     | 20.160   | 82.0953 |
| 2     | 21.232    | 468357  | 20.800     | 21.835   | 17.9047 |



**(S)-1-(2-fluorophenyl)but-3-en-1-ol (compound 2k)**

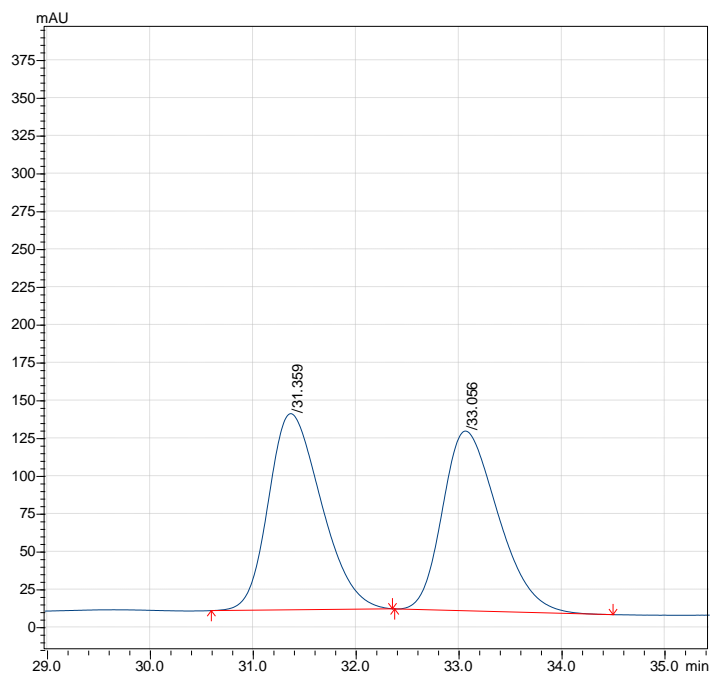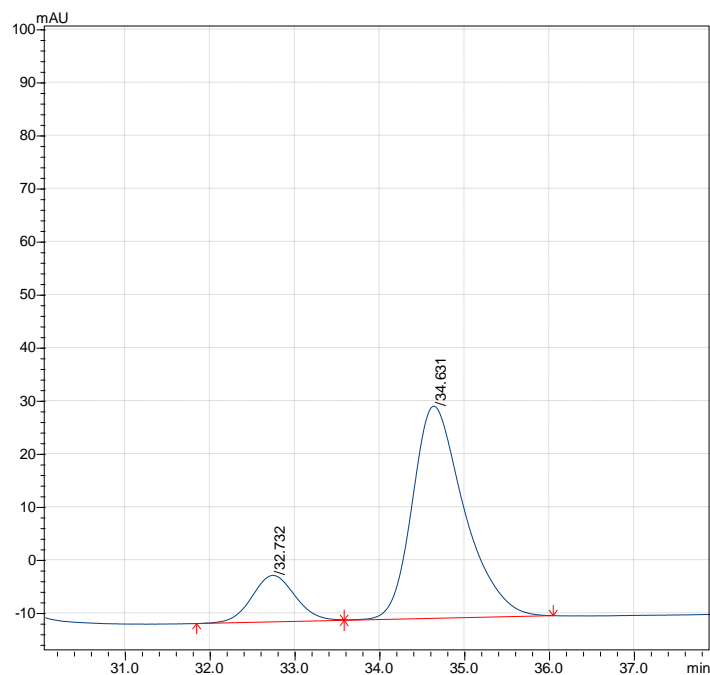

| Peak# | Ret. Time | Area    | Peak Start | Peak End | Area%   |
|-------|-----------|---------|------------|----------|---------|
| 1     | 31.359    | 4627708 | 30.592     | 32.352   | 50.9127 |
| 2     | 33.056    | 4461793 | 32.373     | 34.496   | 49.0873 |

| Peak# | Ret. Time | Area    | Peak Start | Peak End | Area%   |
|-------|-----------|---------|------------|----------|---------|
| 1     | 32.732    | 311842  | 31.840     | 33.579   | 15.5163 |
| 2     | 34.631    | 1697922 | 33.579     | 36.043   | 84.4837 |

**(S)-1-(naphthalen-2-yl)but-3-en-1-ol (compound 2l)**

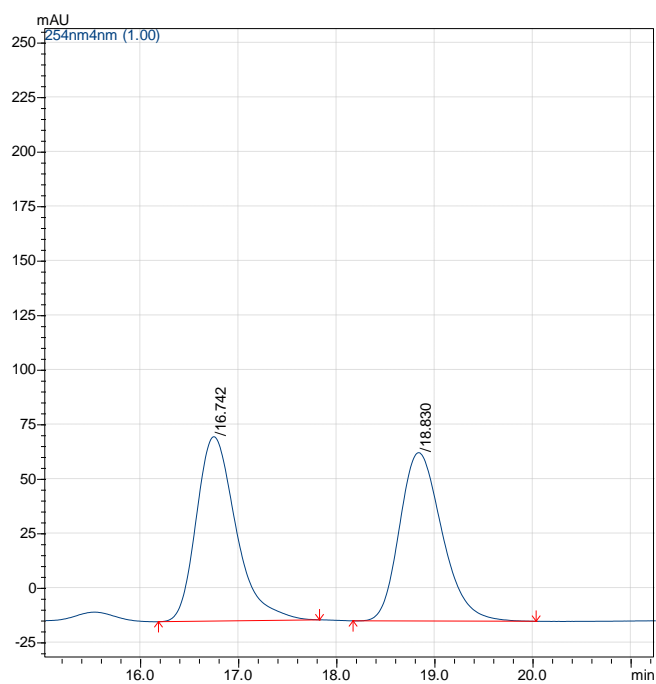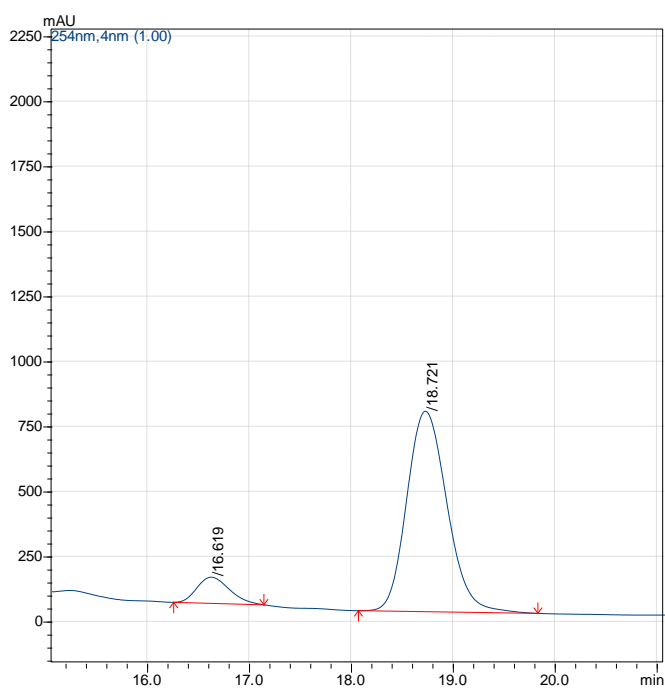

| Peak# | Ret. Time | Area    | Peak Start | Peak End | Area%   |
|-------|-----------|---------|------------|----------|---------|
| 1     | 16.742    | 2373235 | 16.181     | 17.824   | 50.5556 |
| 2     | 18.830    | 2321075 | 18.165     | 20.032   | 49.4444 |

| Peak# | Ret. Time | Area     | Peak Start | Peak End | Area%   |
|-------|-----------|----------|------------|----------|---------|
| 1     | 16.619    | 2233478  | 16.256     | 17.141   | 9.5442  |
| 2     | 18.721    | 21167824 | 18.069     | 19.829   | 90.4558 |

**(S)-1-(thiophen-2-yl)but-3-en-1-ol (compound 2m)**

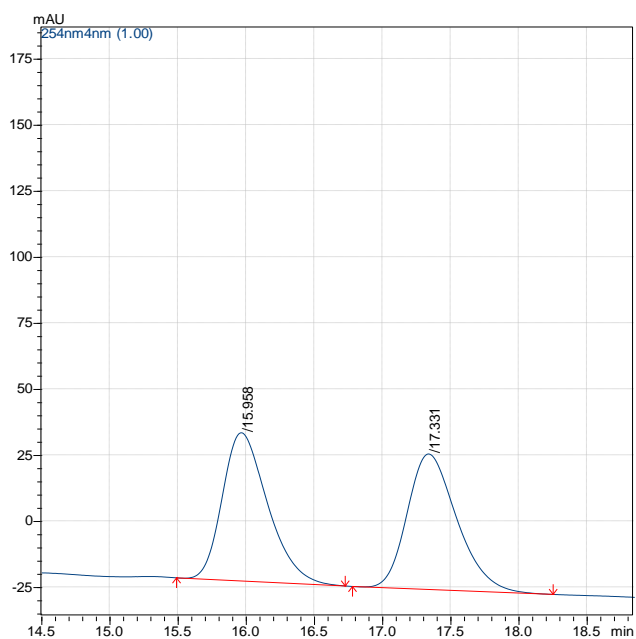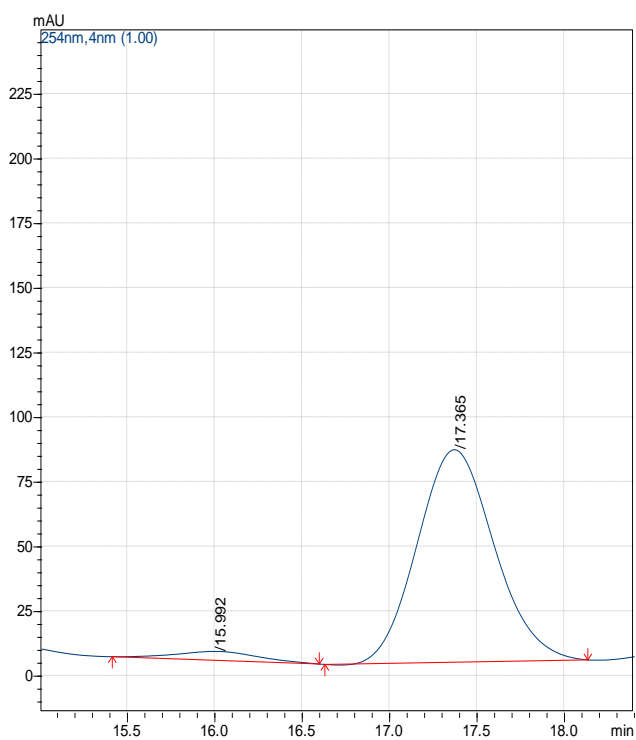

| Peak# | Ret. Time | Area    | Peak Start | Peak End | Area%   |
|-------|-----------|---------|------------|----------|---------|
| 1     | 15.958    | 1295362 | 15.488     | 16.725   | 49.9969 |
| 2     | 17.331    | 1295520 | 16.779     | 18.251   | 50.0031 |

| Peak# | Ret. Time | Area    | Peak Start | Peak End | Area%   |
|-------|-----------|---------|------------|----------|---------|
| 1     | 15.992    | 111982  | 15.413     | 16.597   | 4.2698  |
| 2     | 17.365    | 2510685 | 16.629     | 18.133   | 95.7302 |

**(1*E*,3*R*)-1-Phenyl-1,5-hexadiene-3-ol (compound 2n)**

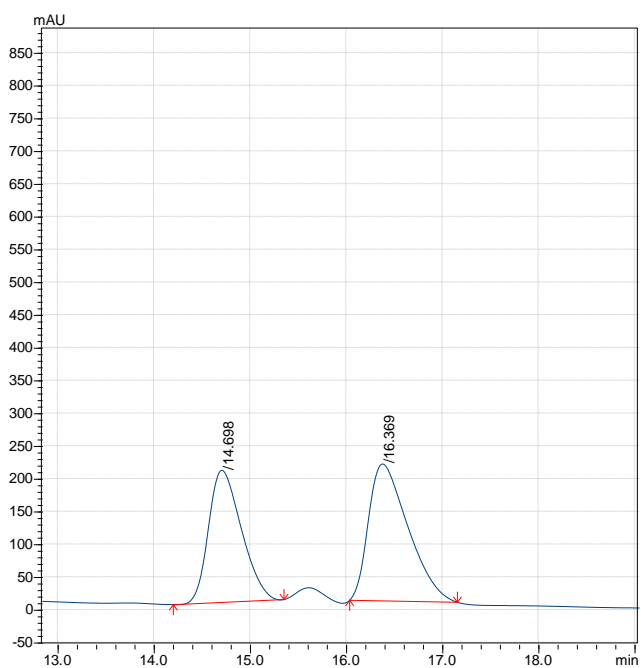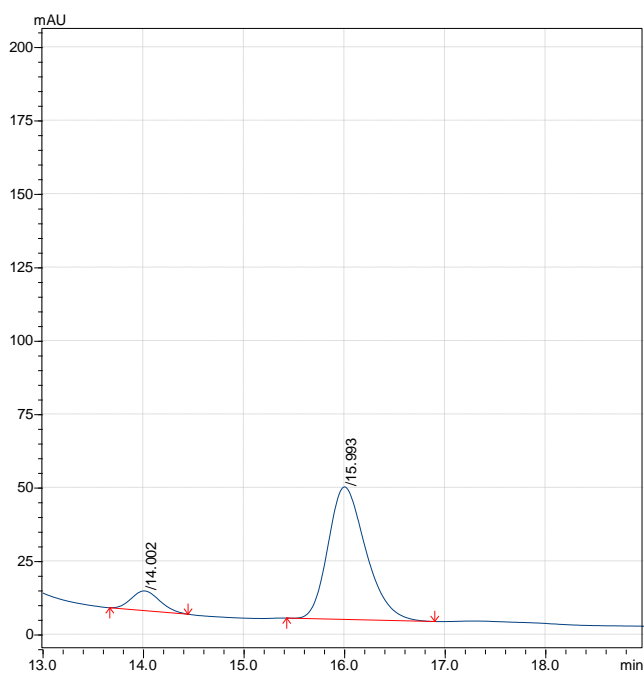

| Peak# | Ret. Time | Area    | Peak Start | Peak End | Area%   |
|-------|-----------|---------|------------|----------|---------|
| 1     | 14.698    | 4791856 | 14.197     | 15.349   | 44.5052 |
| 2     | 16.369    | 5975092 | 16.032     | 17.152   | 55.4948 |

| Peak# | Ret. Time | Area    | Peak Start | Peak End | Area%   |
|-------|-----------|---------|------------|----------|---------|
| 1     | 14.002    | 132115  | 13.664     | 14.443   | 10.0803 |
| 2     | 15.993    | 1178506 | 15.424     | 16.896   | 89.9197 |

**(1E,3R)-2-Methyl-1-phenyl-1,5-hexadiene-3-ol (compound 2o)**

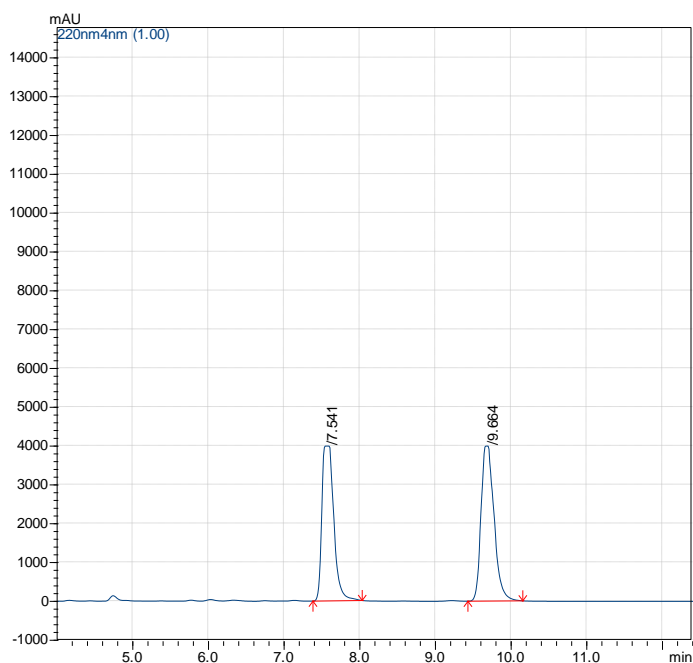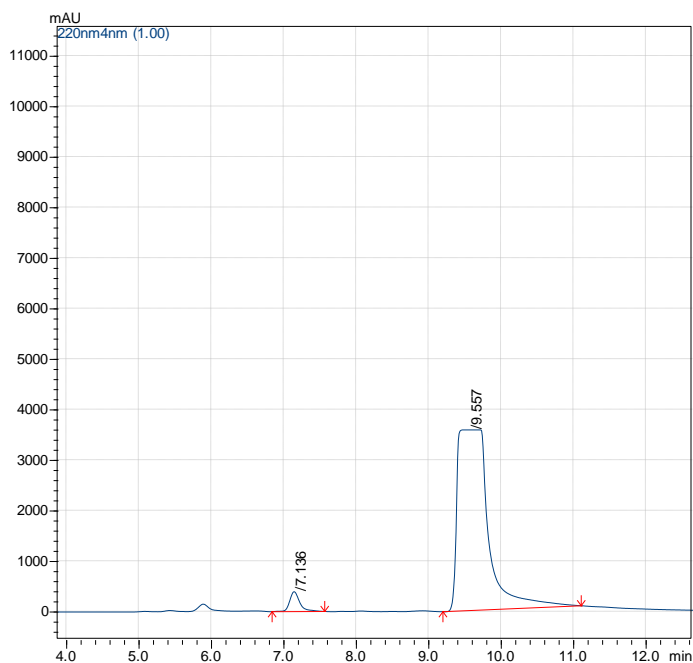

| Peak# | Ret. Time | Area     | Peak Start | Peak End | Area%   |
|-------|-----------|----------|------------|----------|---------|
| 1     | 7.541     | 43735650 | 7.381      | 8.032    | 47.7848 |
| 2     | 9.664     | 47790667 | 9.429      | 10.155   | 52.2152 |

| Peak# | Ret. Time | Area      | Peak Start | Peak End | Area%   |
|-------|-----------|-----------|------------|----------|---------|
| 1     | 7.136     | 3861045   | 6.837      | 7.563    | 3.4801  |
| 2     | 9.557     | 107083851 | 9.195      | 11.104   | 96.5199 |

### (R)-1-Phenylpent-4-en-2-ol (compound 2p)

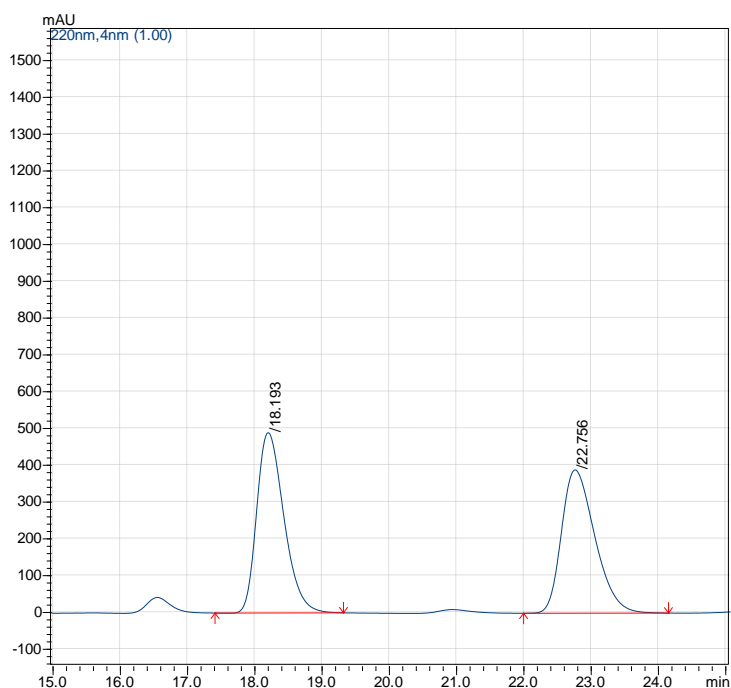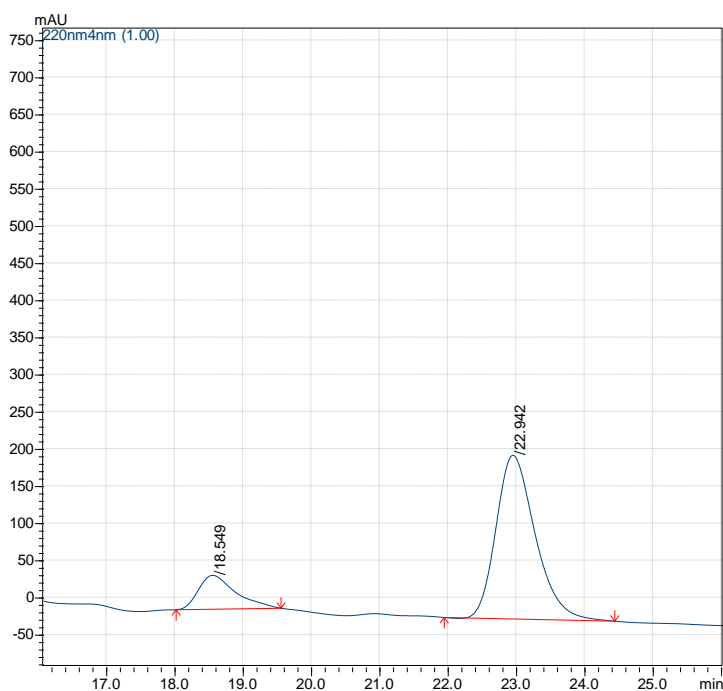

| Peak# | Ret. Time | Area     | Peak Start | Peak End | Area%   |
|-------|-----------|----------|------------|----------|---------|
| 1     | 18.193    | 13767610 | 17.408     | 19.317   | 50.6477 |
| 2     | 22.756    | 13415453 | 21.995     | 24.149   | 49.3523 |

| Peak# | Ret. Time | Area    | Peak Start | Peak End | Area%   |
|-------|-----------|---------|------------|----------|---------|
| 1     | 18.549    | 1726488 | 18.016     | 19.552   | 16.4297 |
| 2     | 22.942    | 8781866 | 21.941     | 24.437   | 83.5703 |

## Copy of $^1\text{H}$ and $^{13}\text{C}$ spectra for the catalysts

### $^1\text{H}$ and $^{13}\text{C}$ spectra of *N*-Boc-*L*-*tert*-leucine

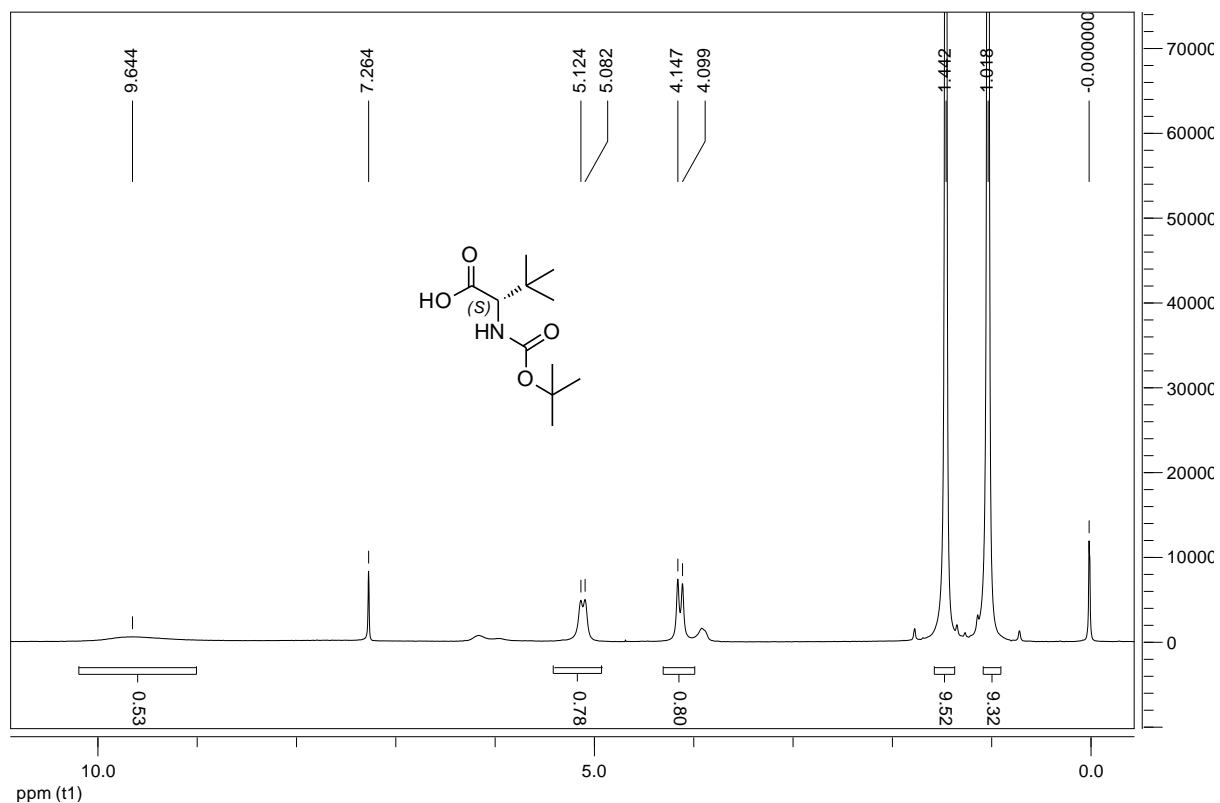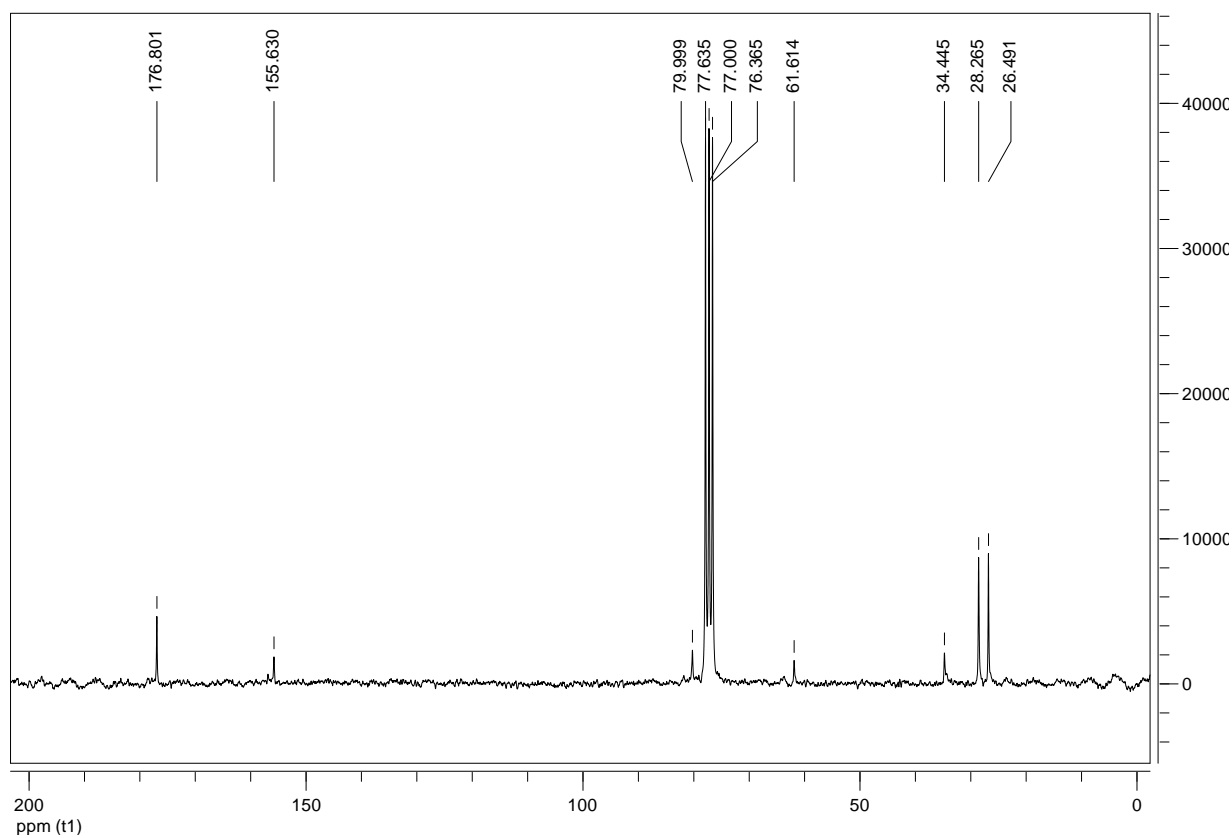

### $^1\text{H}$ and $^{13}\text{C}$ spectra for pre catalyst of (*R,S*)-1

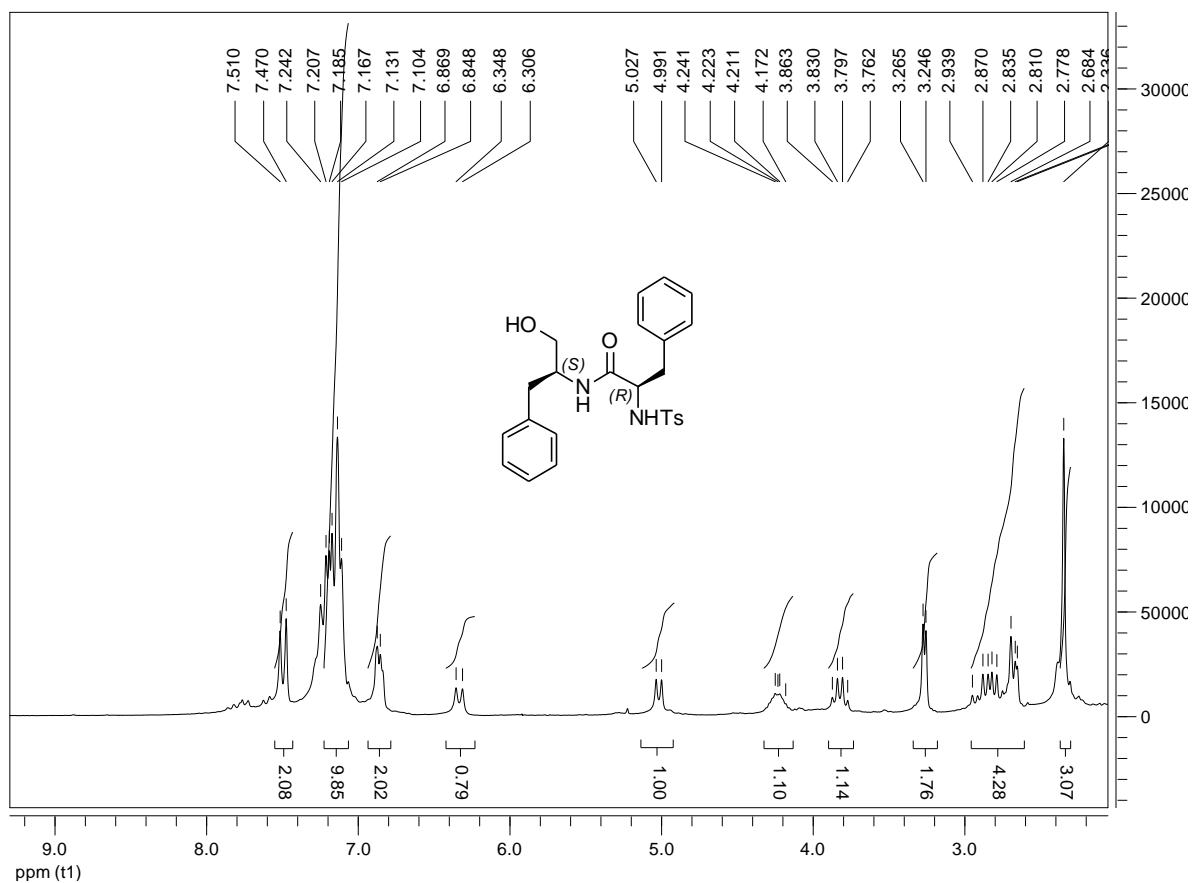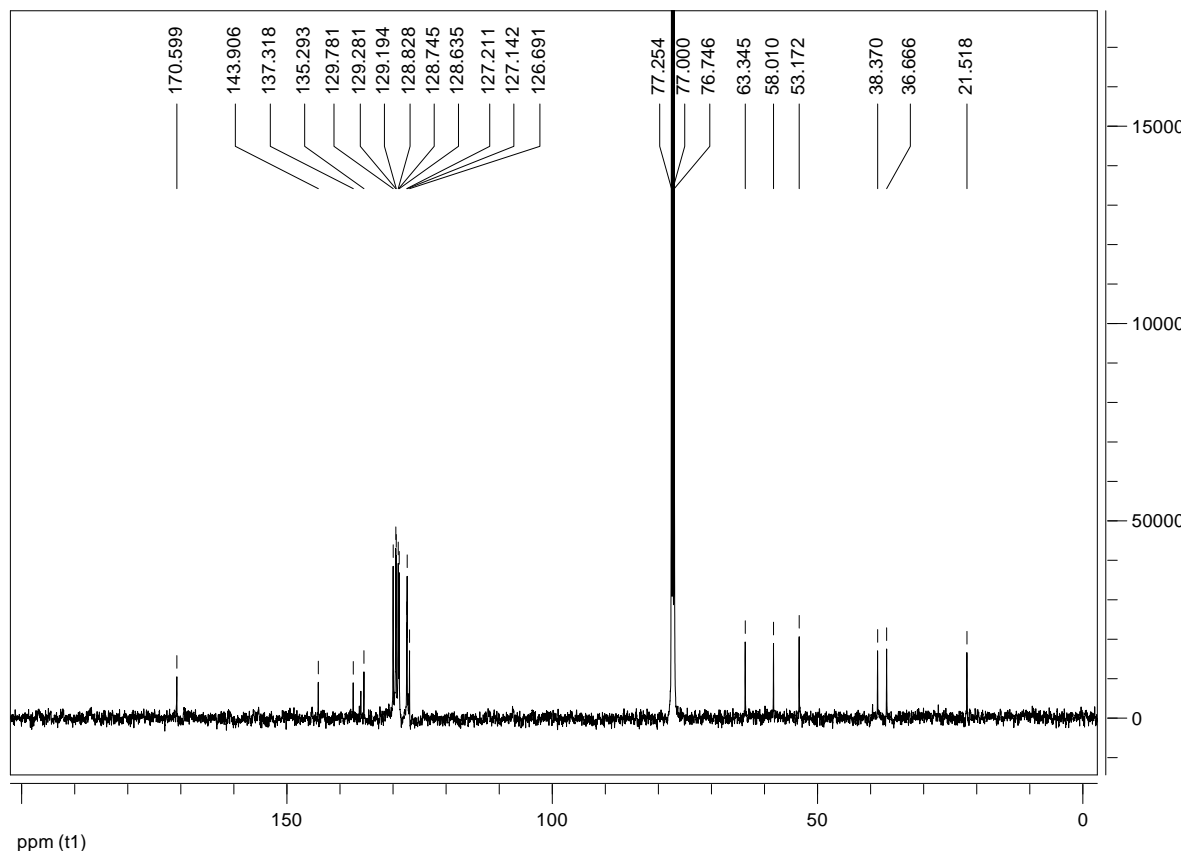



### $^1\text{H}$ and $^{13}\text{C}$ spectra for pre catalyst of (*S,R*)-1

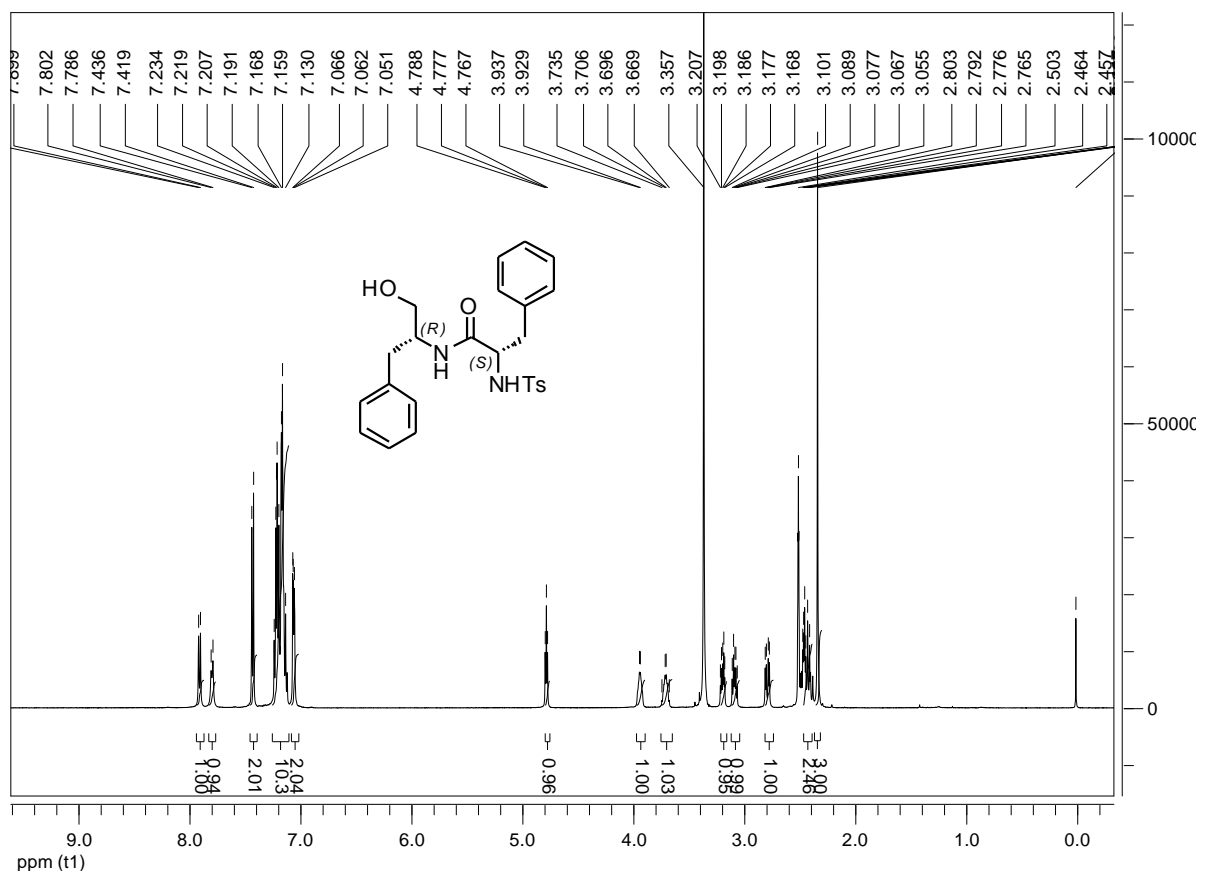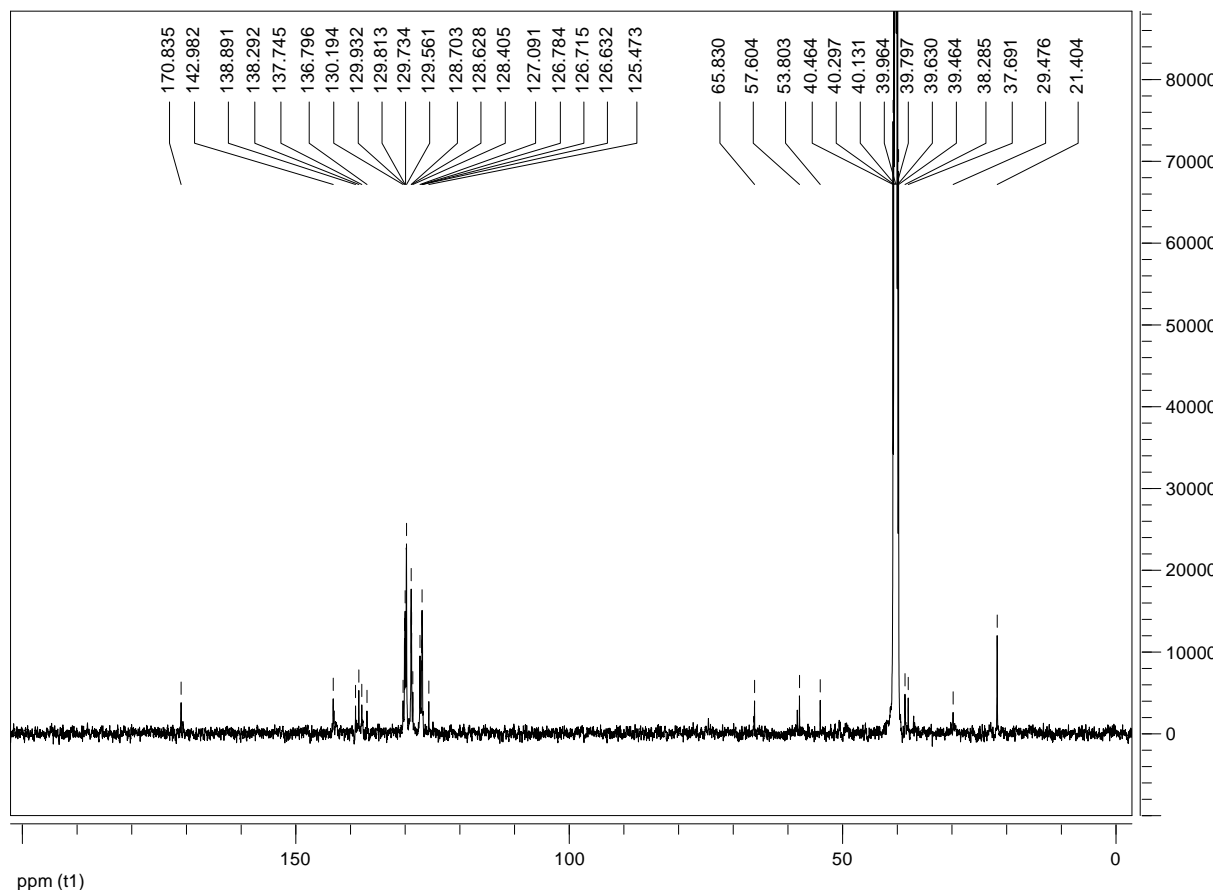

### $^1\text{H}$ and $^{13}\text{C}$ spectra for pre catalyst of (*S,S*)-6

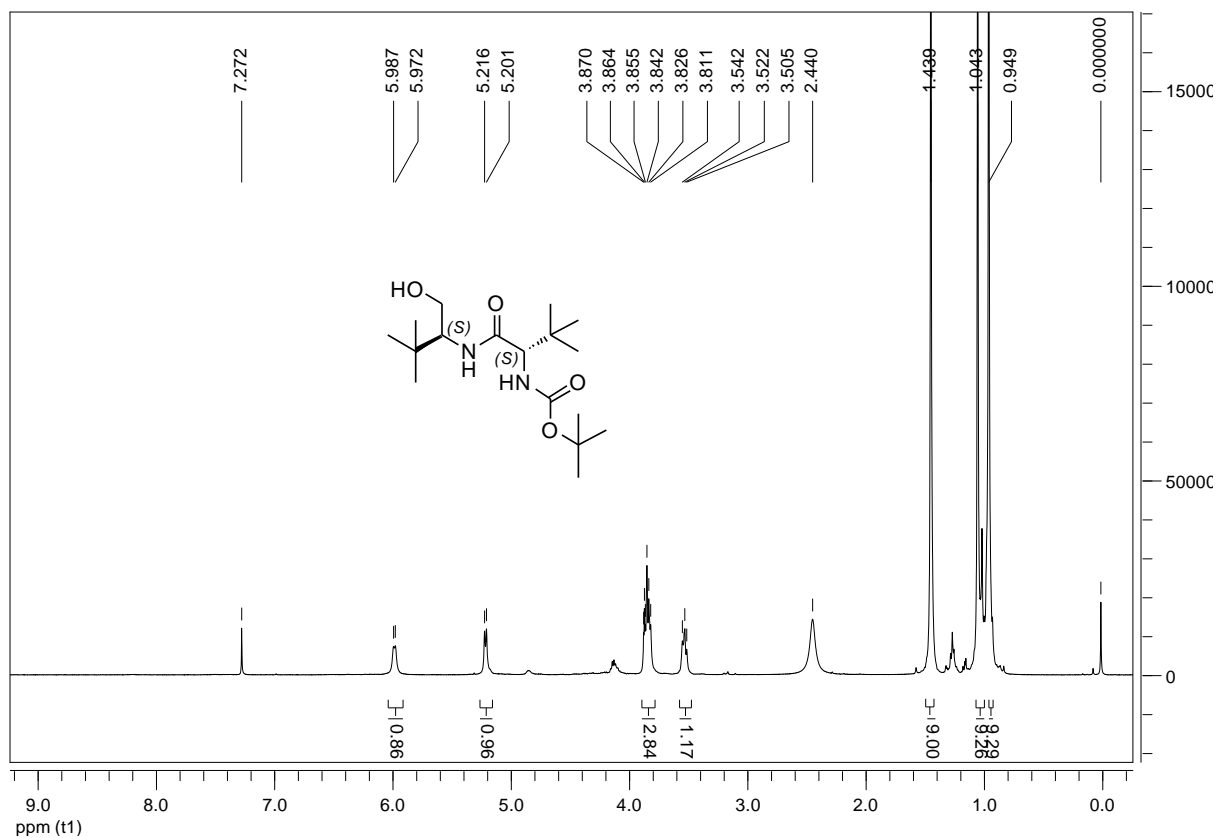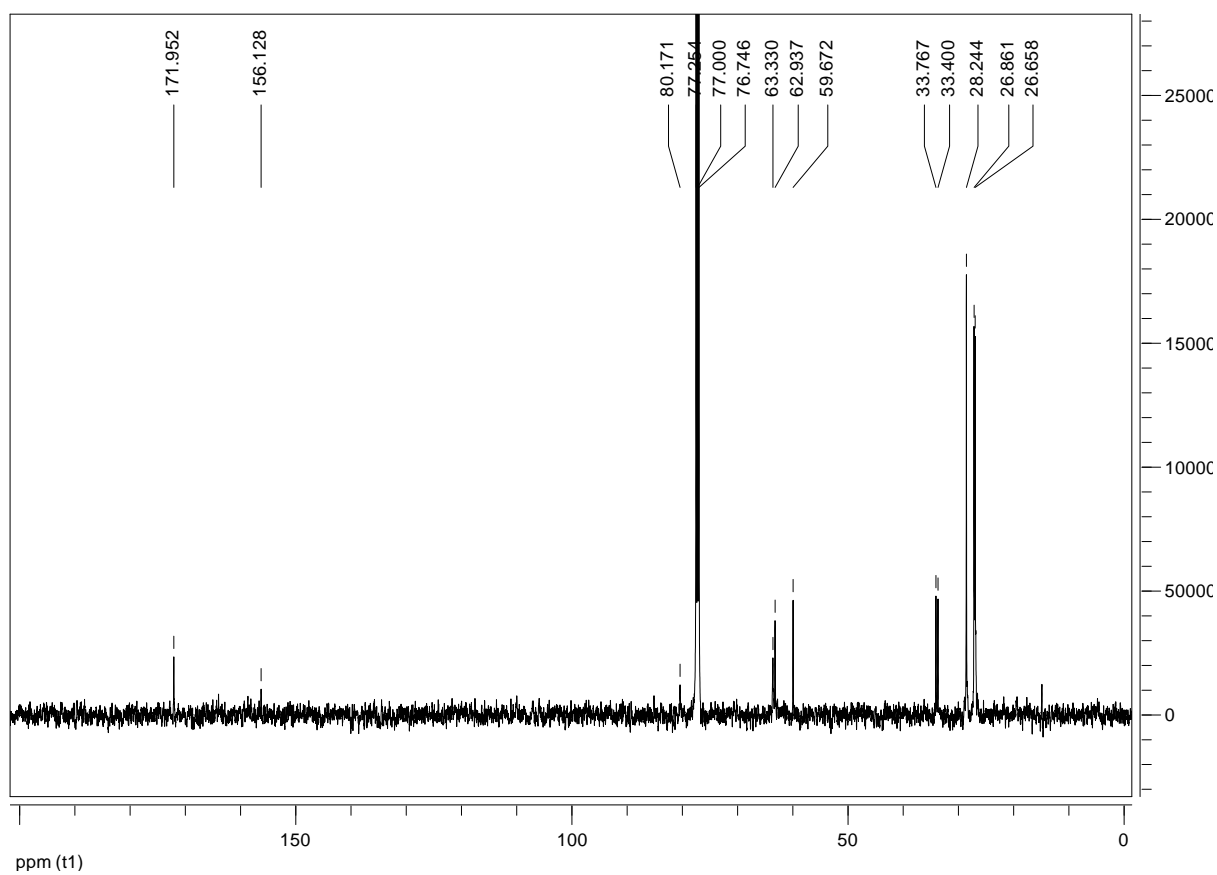

### $^1\text{H}$ and $^{13}\text{C}$ spectra of (*R,S*)-1

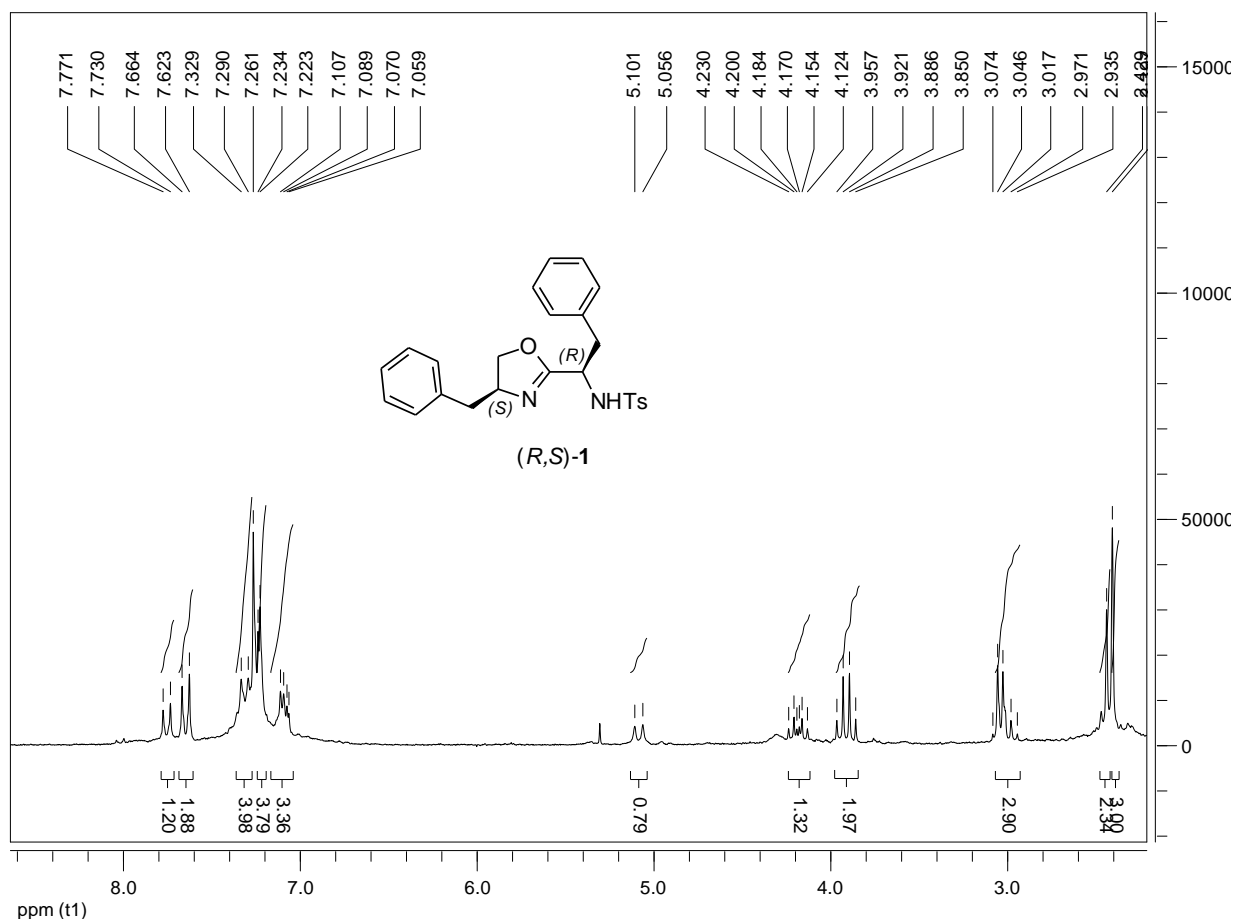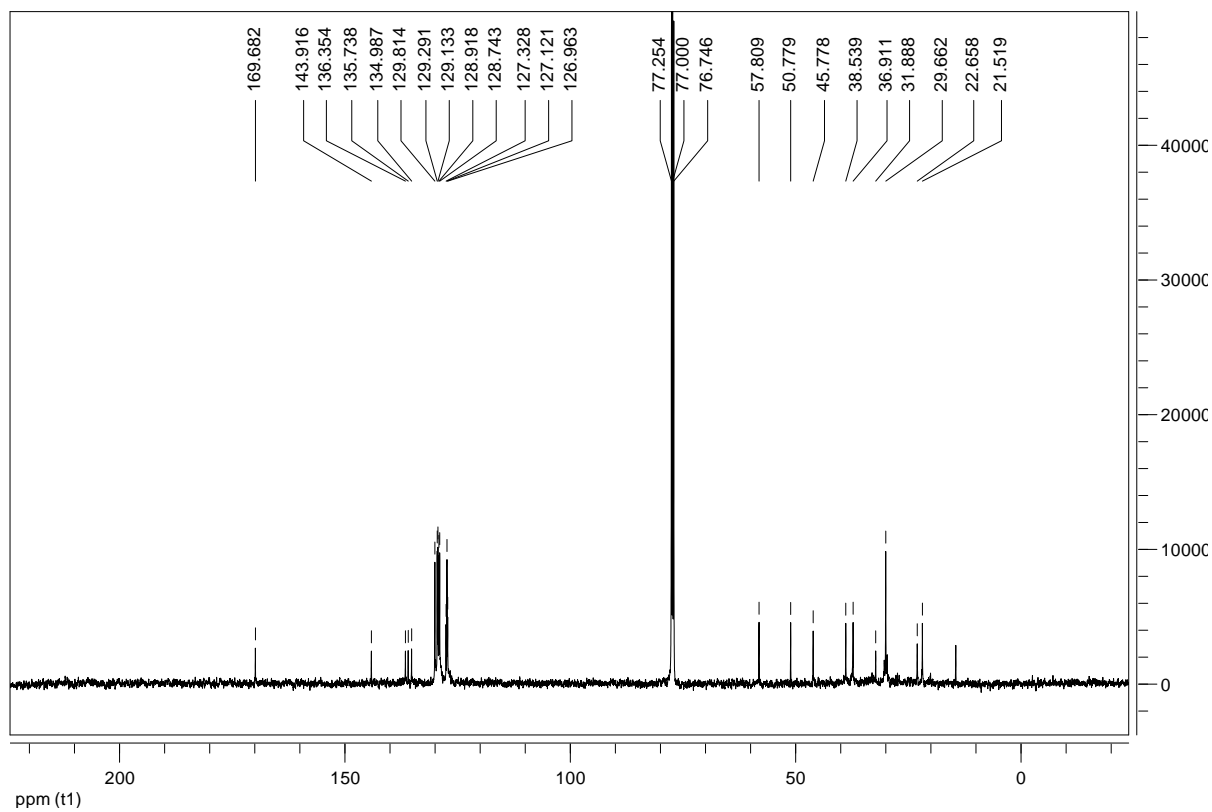



### $^1\text{H}$ and $^{13}\text{C}$ spectra of (*S,S*)-6

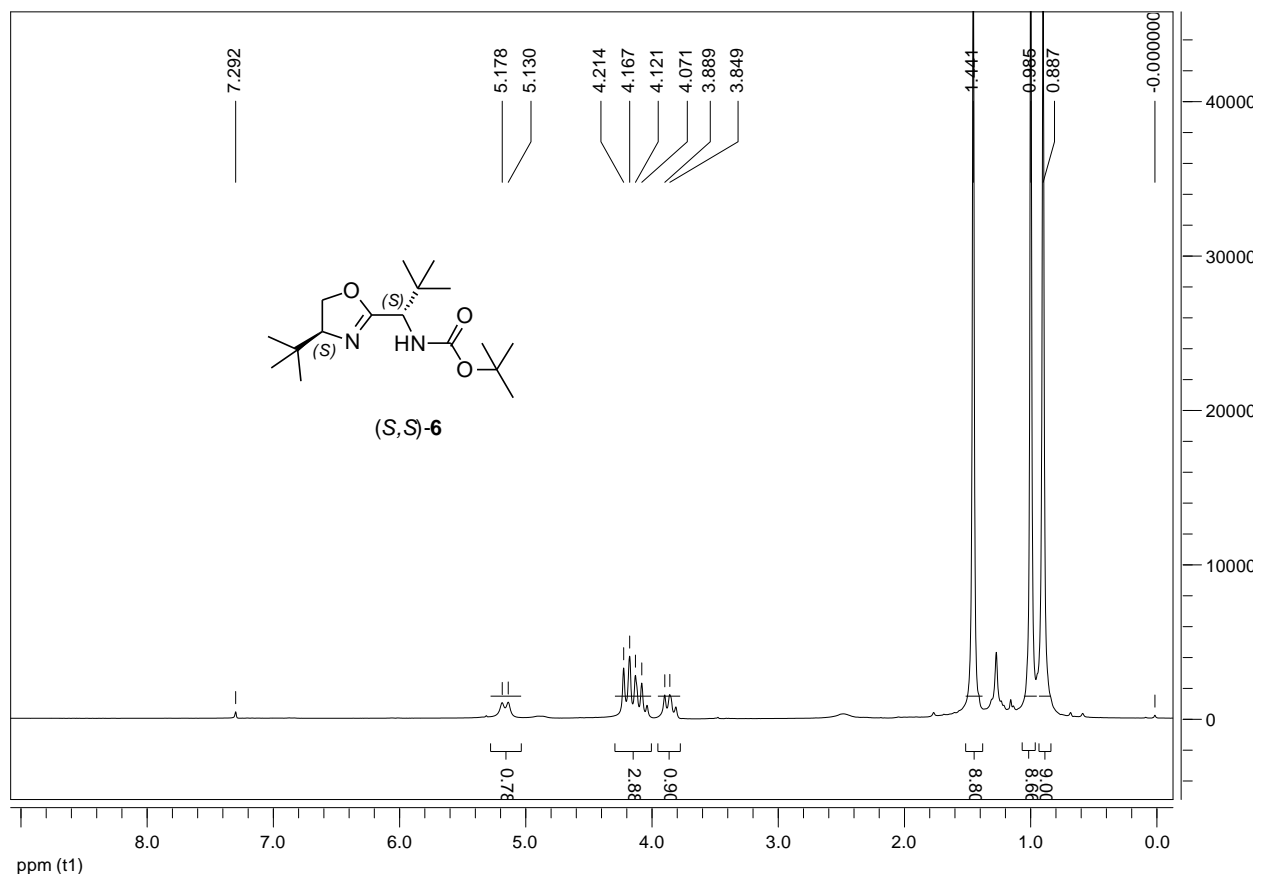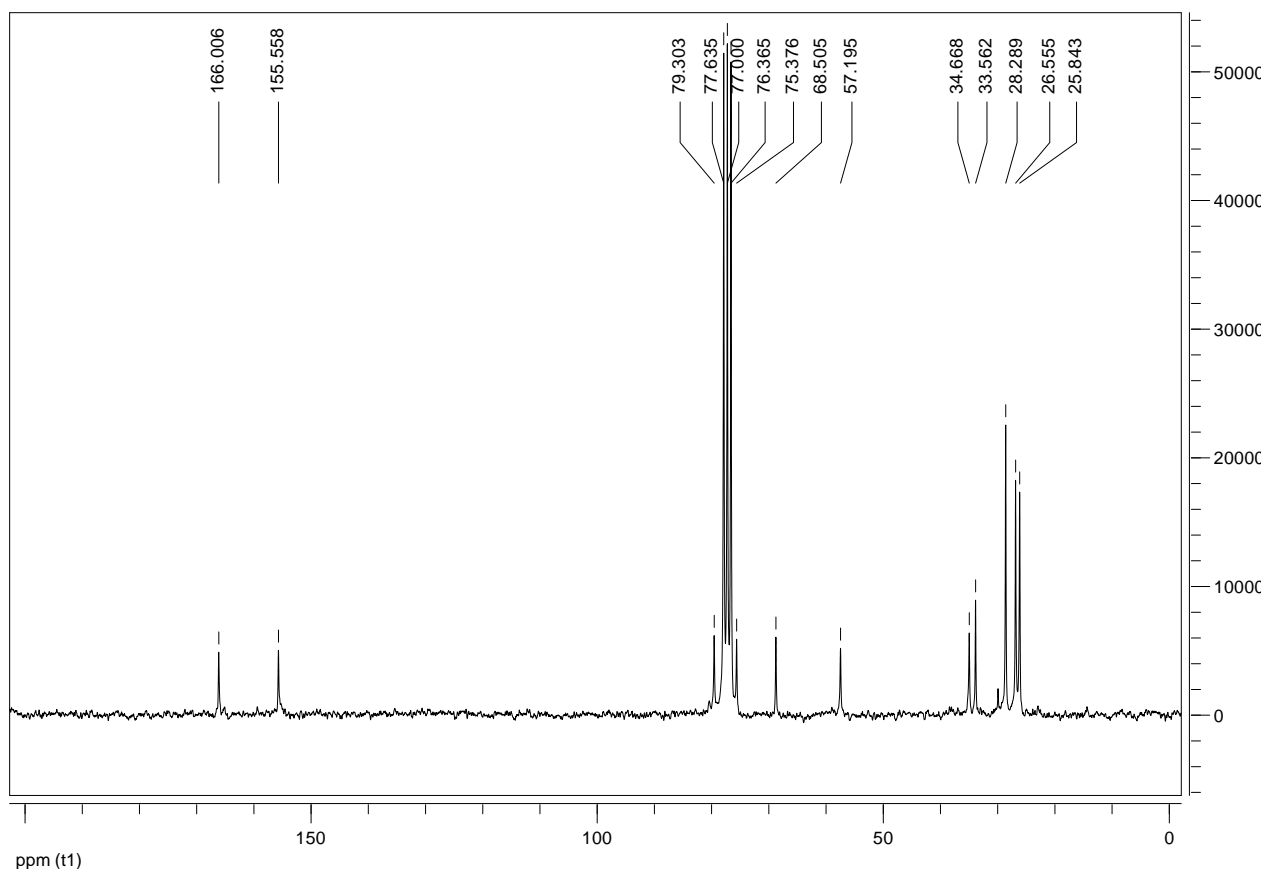

### Copy of $^1\text{H}$ , $^{13}\text{C}$ and Mass spectra of the recovered catalyst

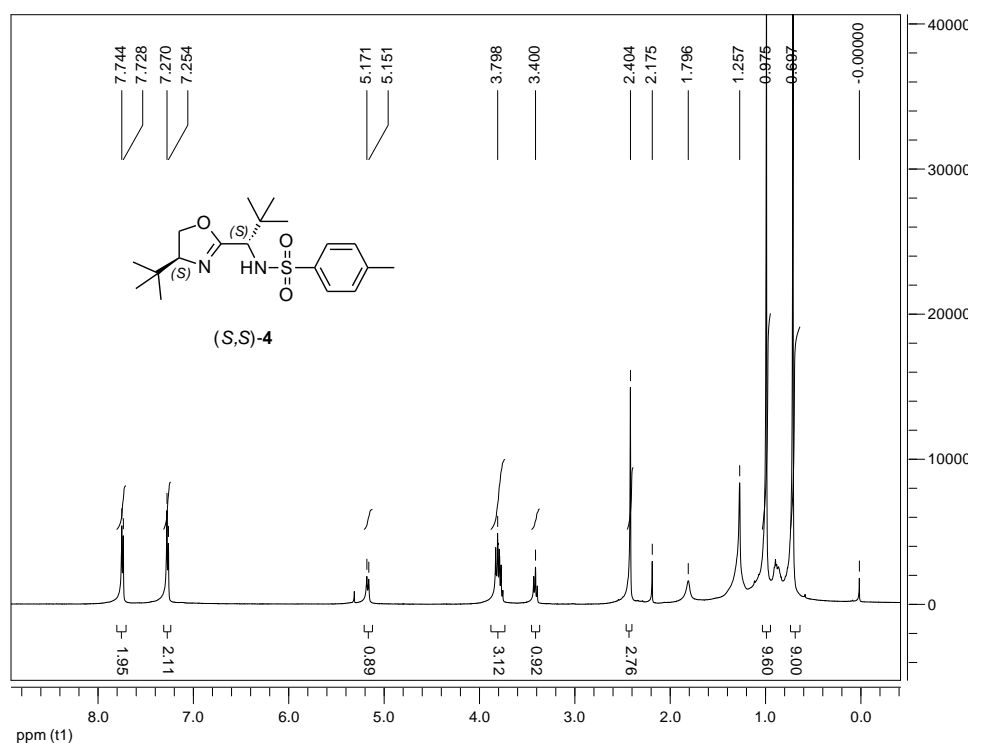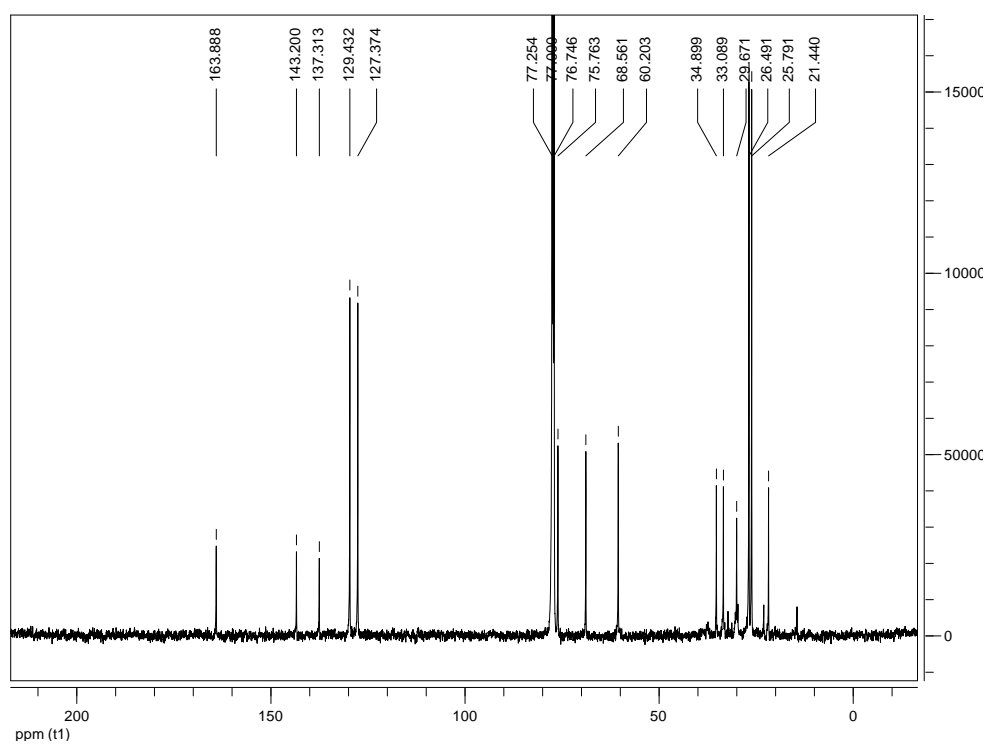

### Mass spectra (exact mass: 366.20)

TL-CY-recovered N 13 (0.241)

1: TOF MS ES-295

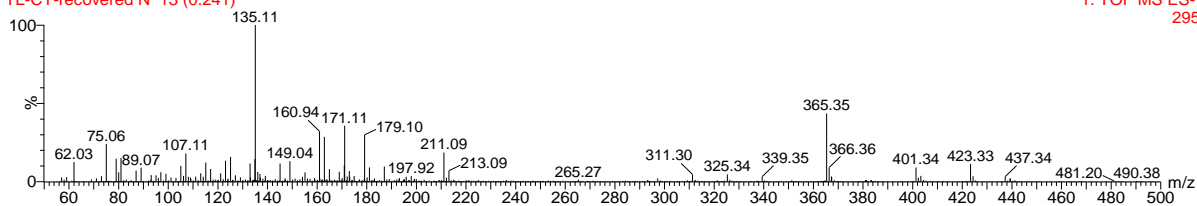

## NMR experiments for mechanistic interpretation (Figure 1, main paper)

a)  $^{13}\text{C}$  spectrum of benzaldehyde taken in  $\text{CDCl}_3$

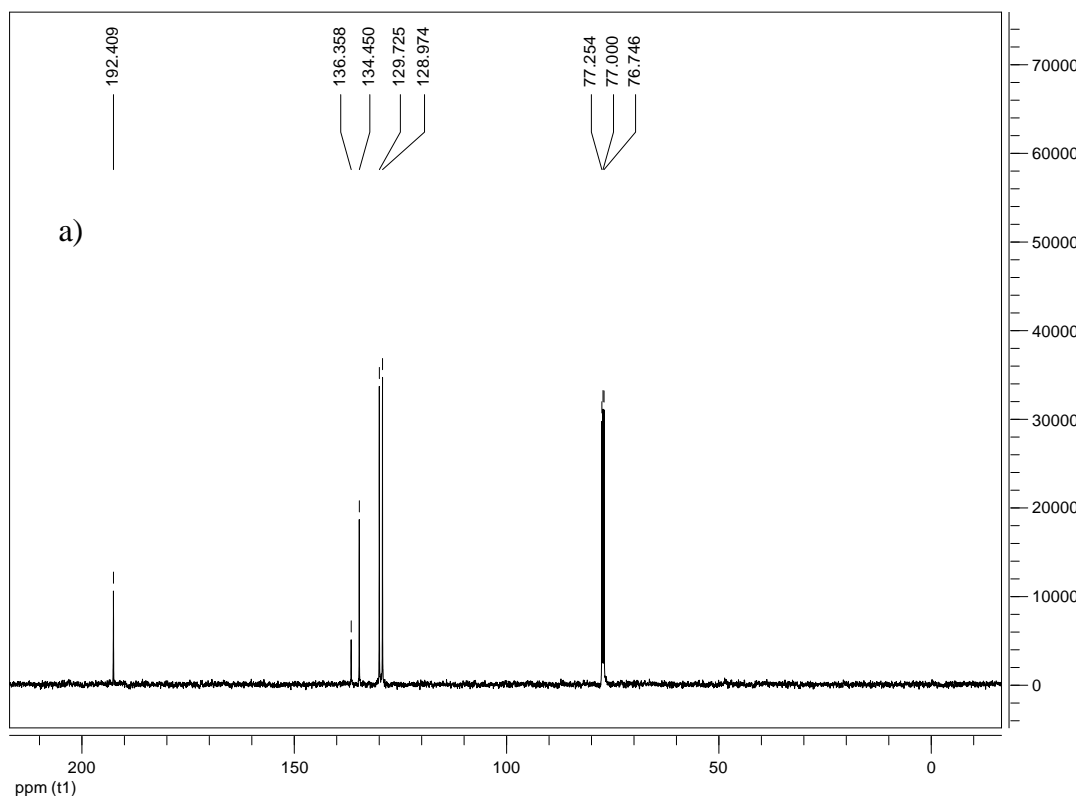

b)  $^{13}\text{C}$  spectrum of catalyst (*S,S*)-**4** taken in  $\text{CDCl}_3$

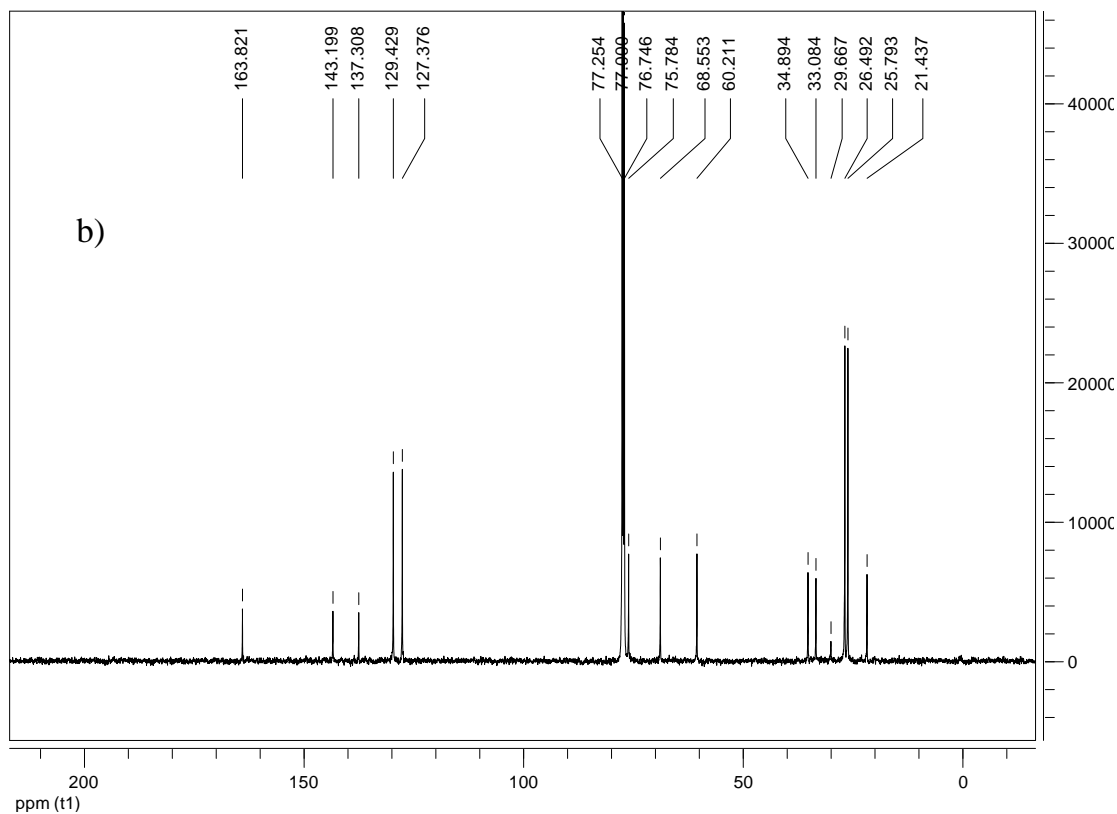

c)  $^{13}\text{C}$  spectrum of catalyst (*S,S*)-**4** after interaction with allyltrichlorosilane (in  $\text{CDCl}_3$ )

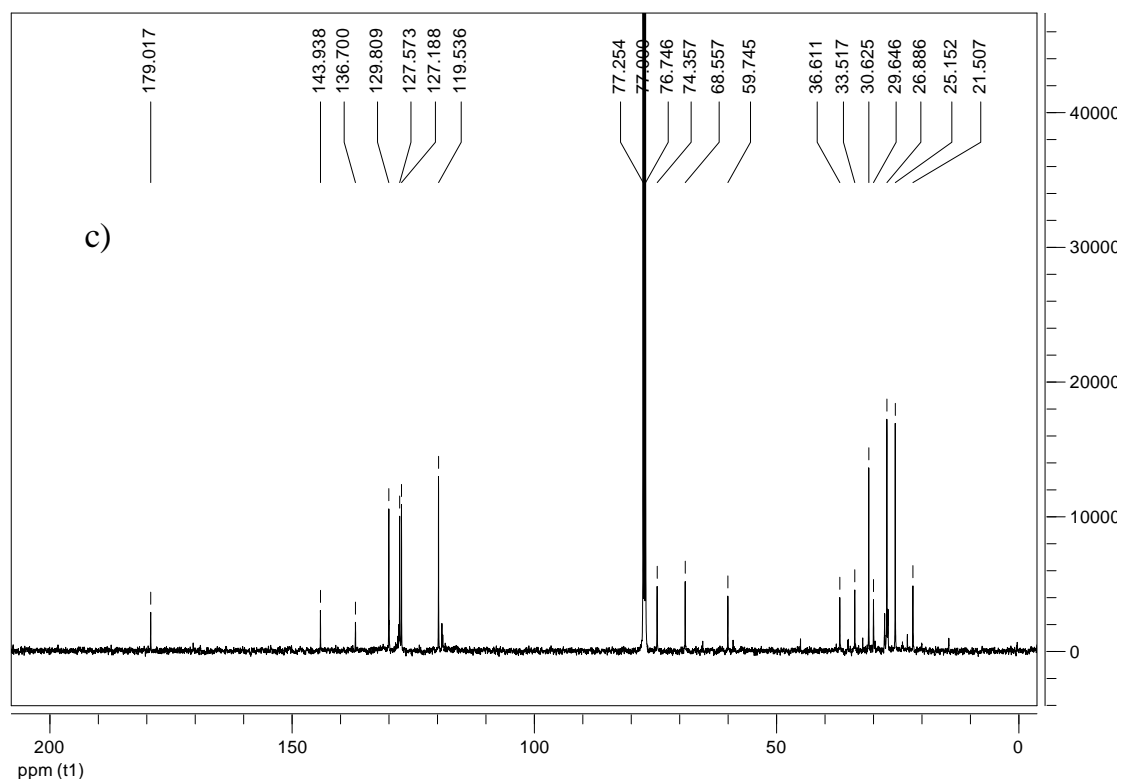

d)  $^{13}\text{C}$  spectrum of catalyst (*S,S*)-**4** after interaction with allyltrichlorosilane and benzaldehyde (in  $\text{CDCl}_3$ )

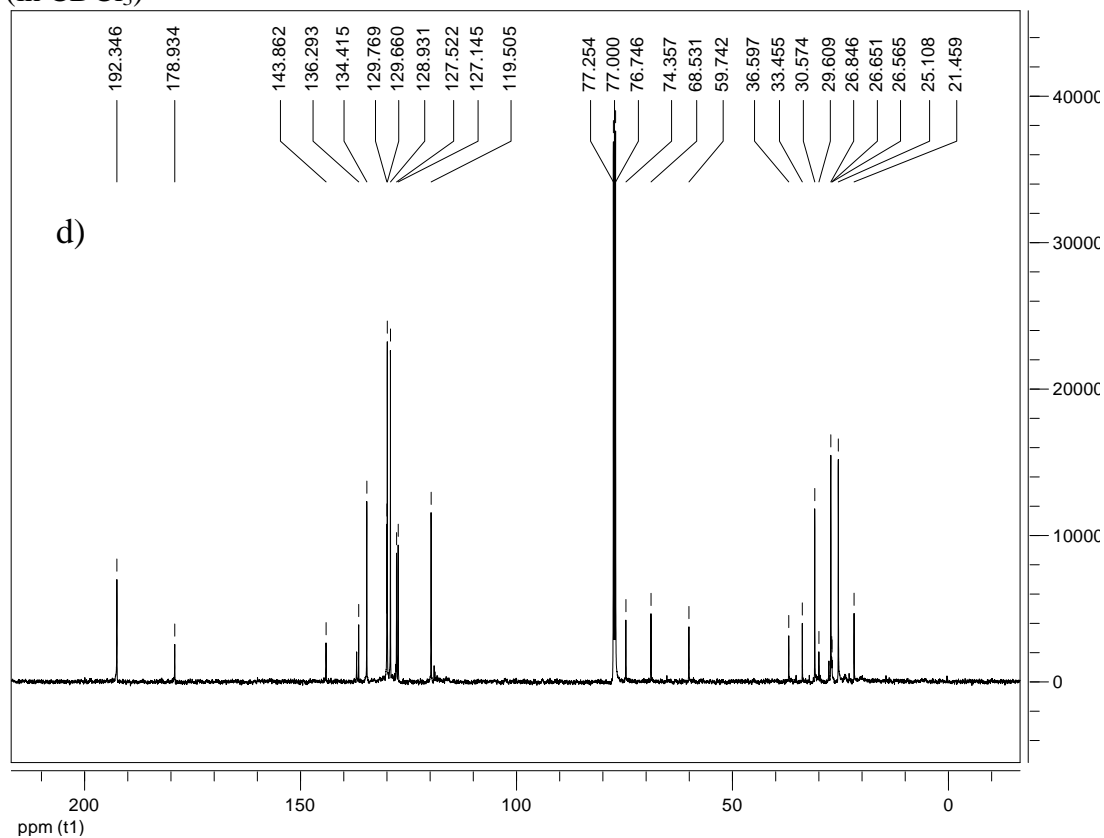



e)  $^{13}\text{C}$  spectrum of catalyst (*S,S*)-**4** after interaction with allyltrichlorosilane, benzaldehyde and DIPEA (in  $\text{CDCl}_3$ )

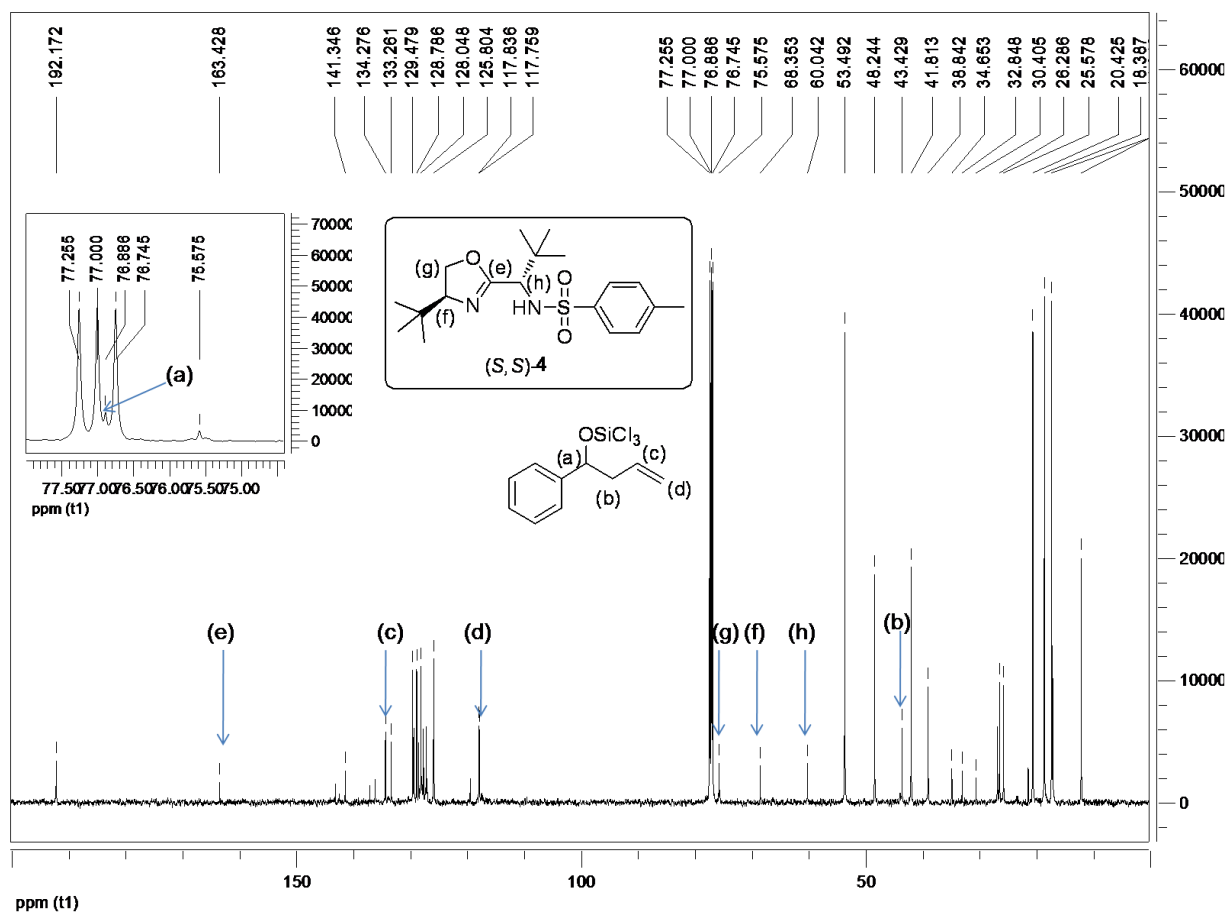

# <sup>1</sup>H NMR spectra of the catalyst, substrate, allyltrichlorosilane, DIPEA and reaction mixture (with respect to time) (Figure 2, main paper)

## a) <sup>1</sup>H spectrum of catalyst (*S,S*)-4

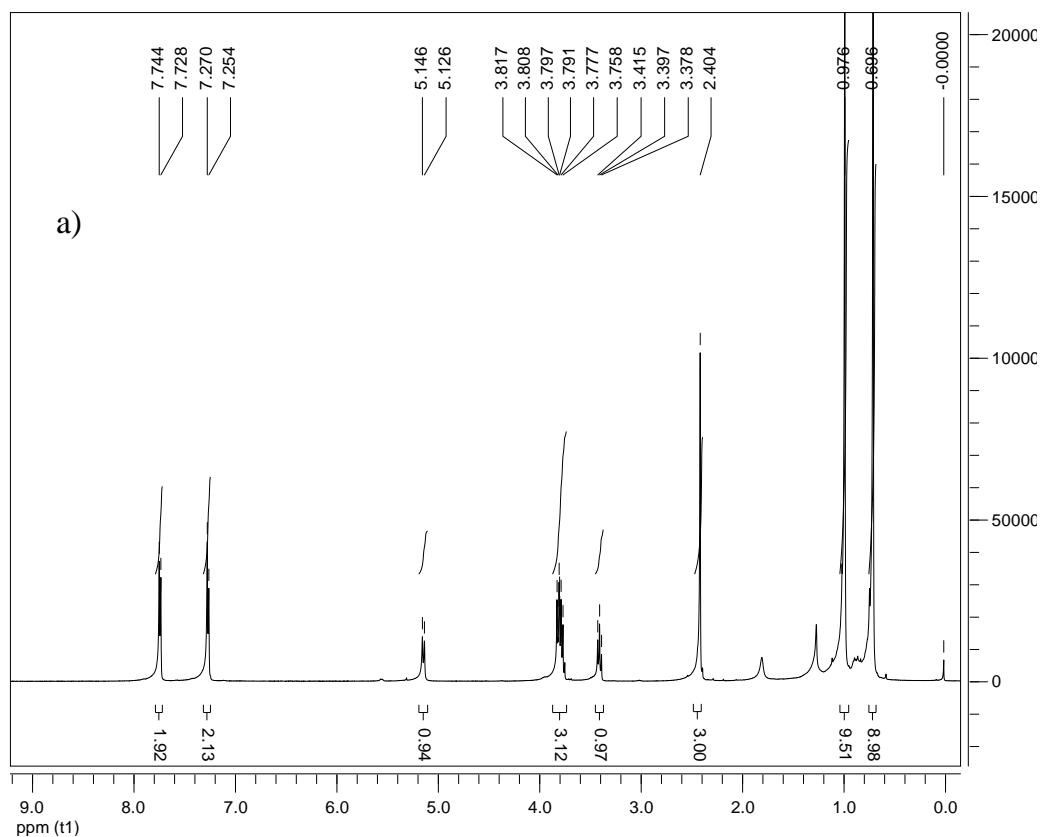

## b) <sup>1</sup>H spectrum of benzaldehyde

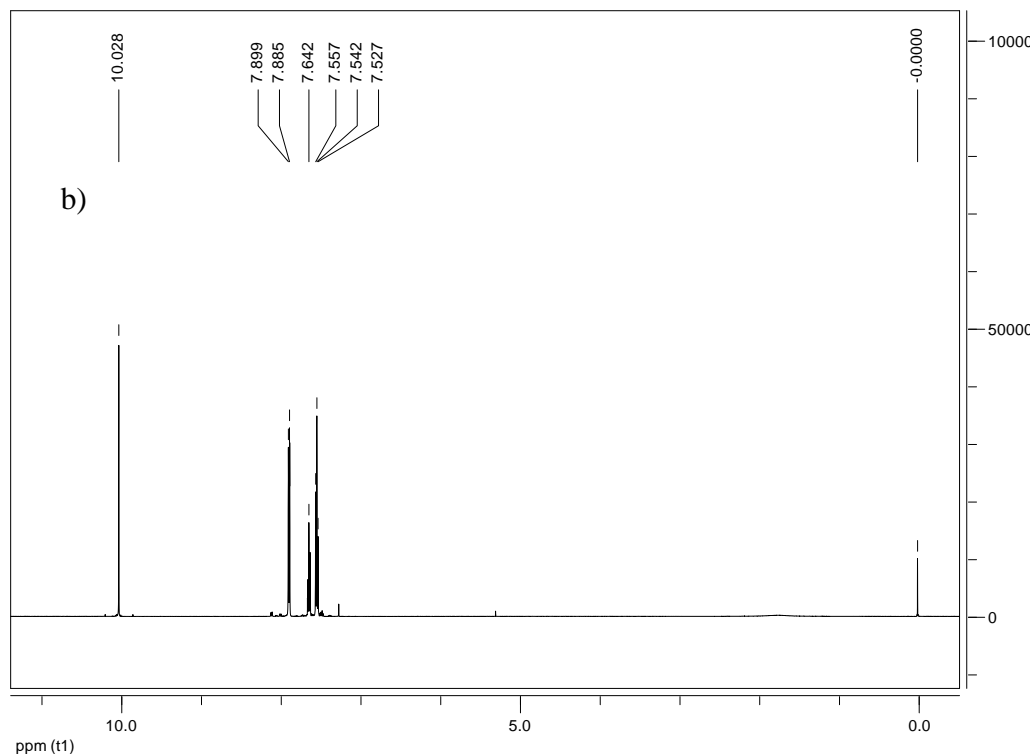

c)  $^1\text{H}$  spectrum of allyltrichlorosilane

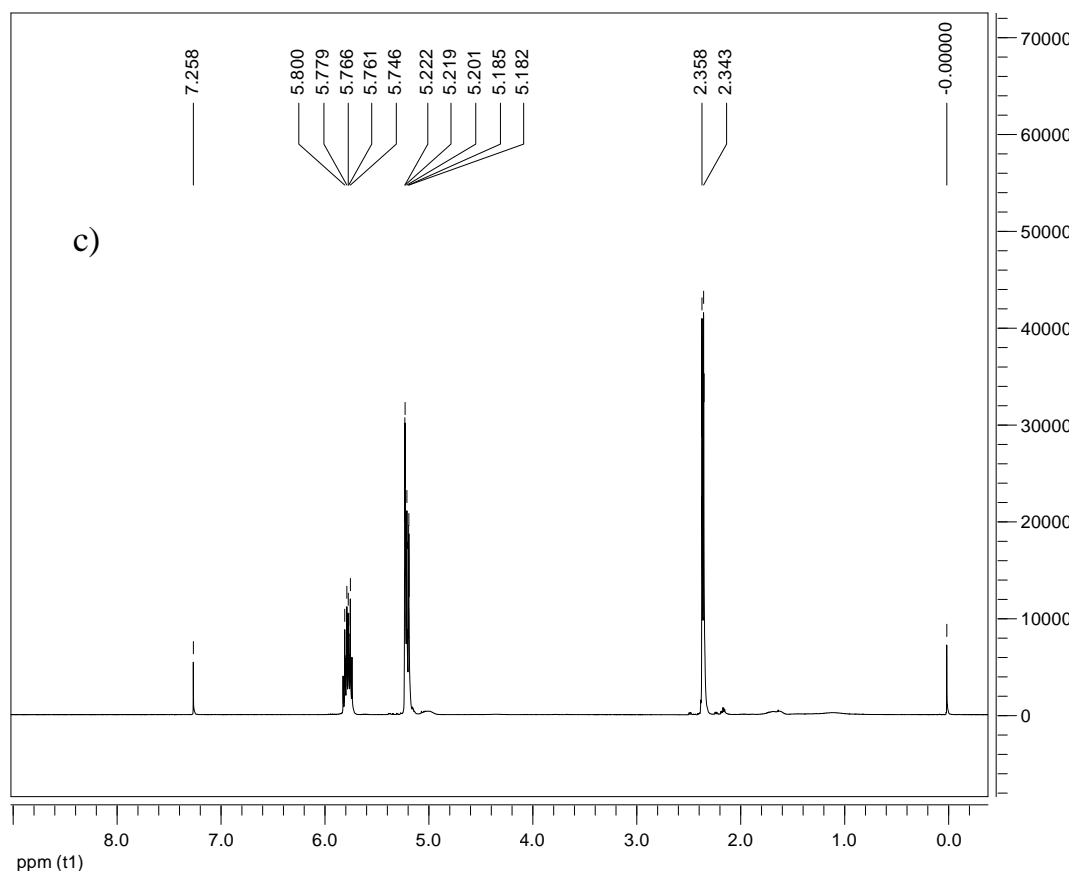

d)  $^1\text{H}$  spectrum of DIPEA

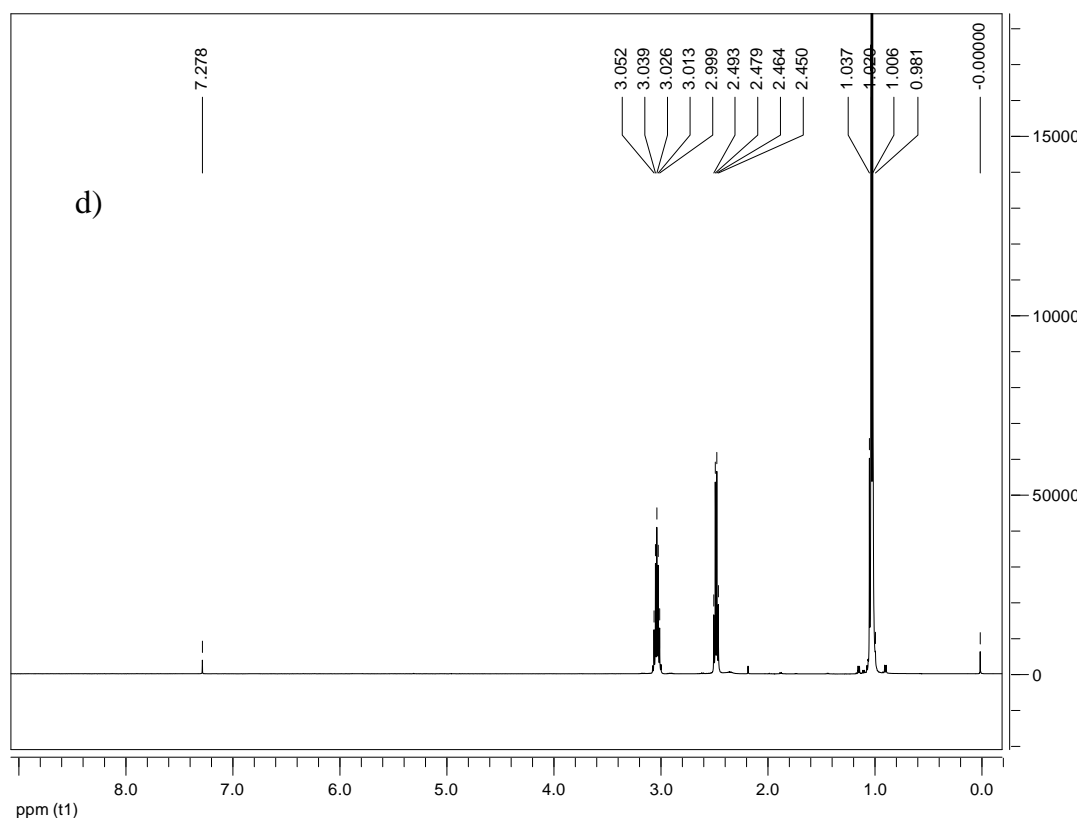

e)  $^1\text{H}$  spectrum recorded at 0 h from the addition of DIPEA into the reaction mixture containing catalyst, benzaldehyde and allyltrichlorosilane

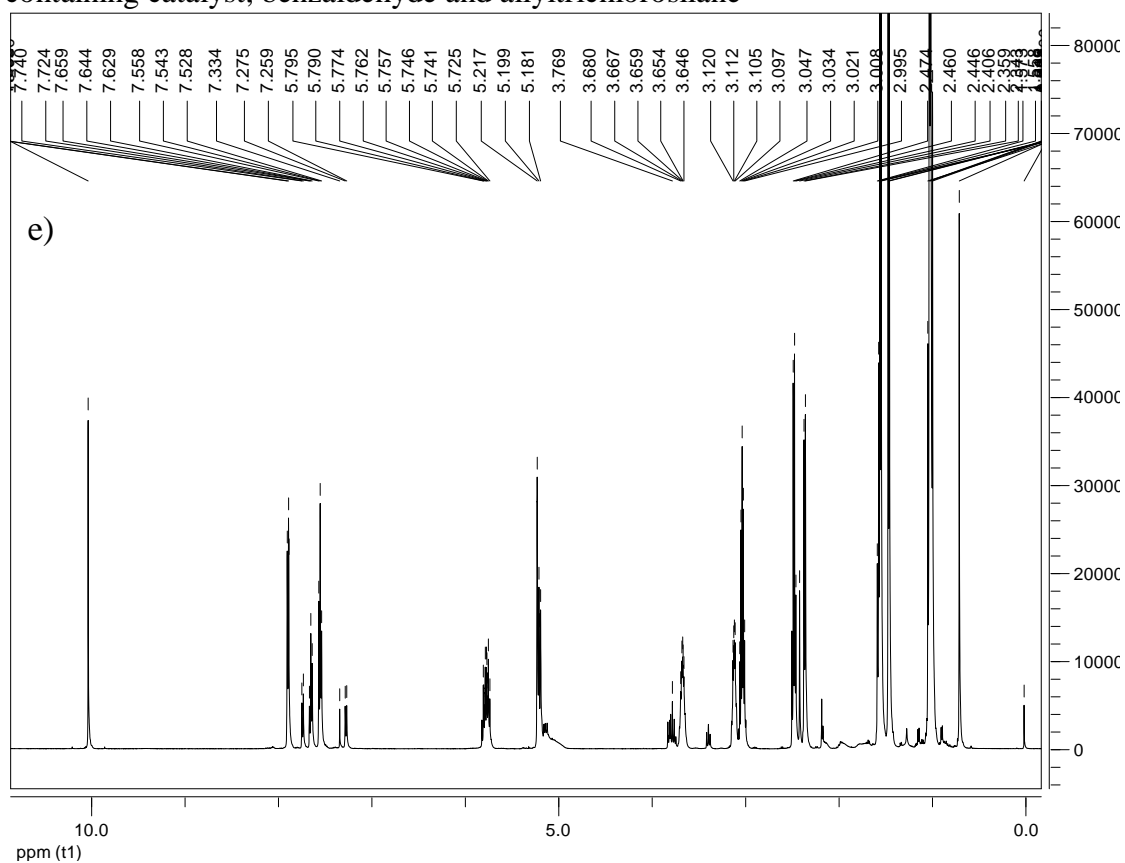

f)  $^1\text{H}$  spectrum recorded after 4 h from the addition of DIPEA into the reaction mixture

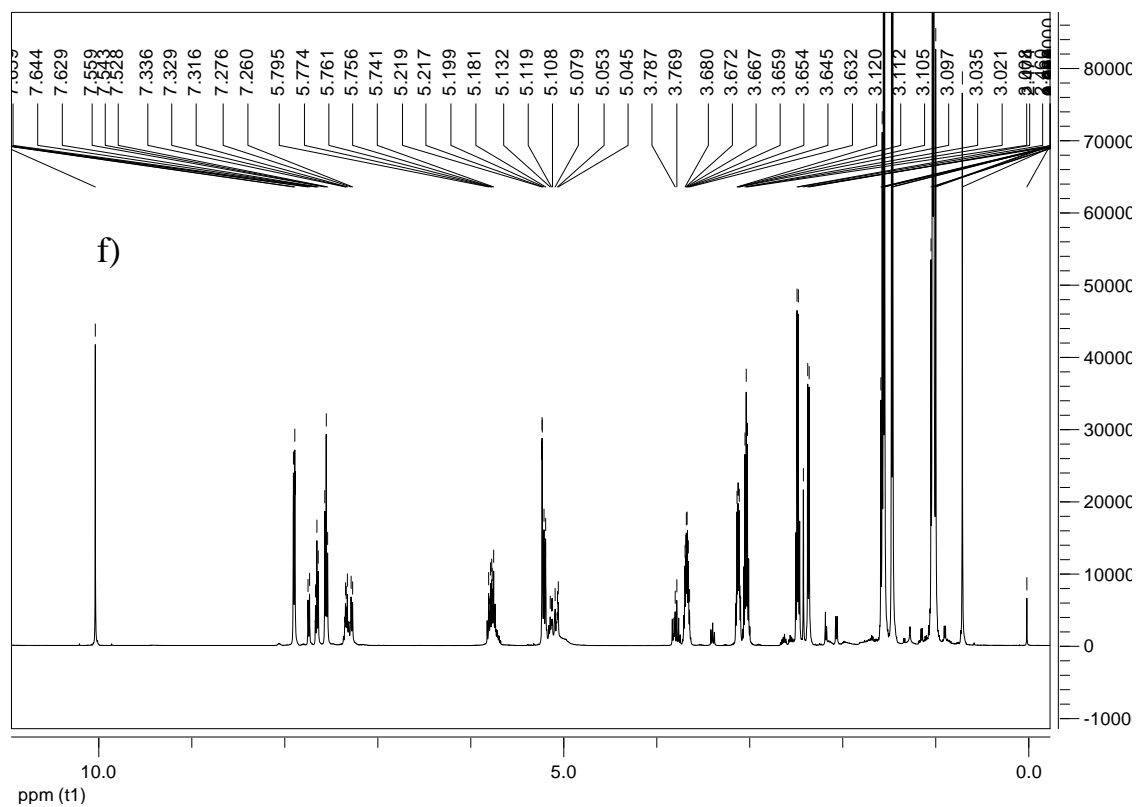

g)  $^1\text{H}$  spectrum recorded after 8 h from the addition of DIPEA into the reaction mixture

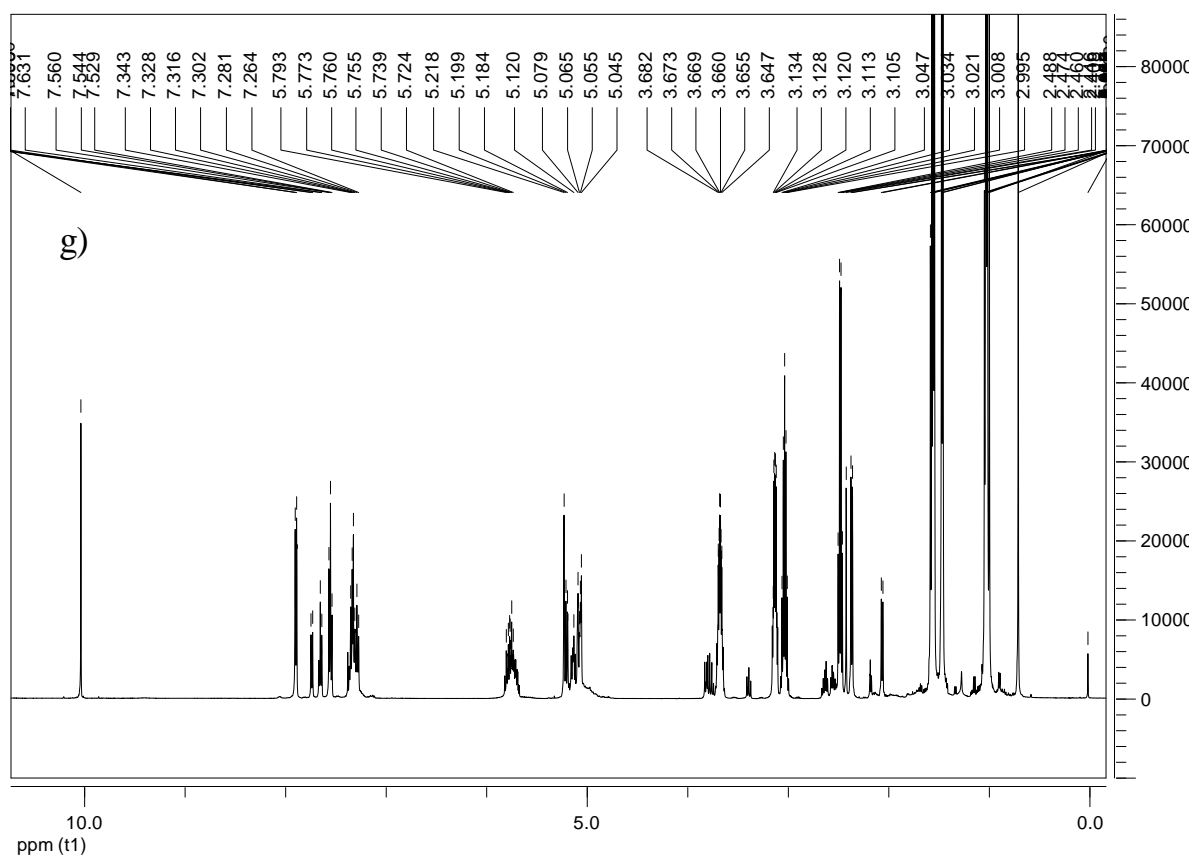

h)  $^1\text{H}$  spectrum recorded after 12 h from the addition of DIPEA into the reaction mixture

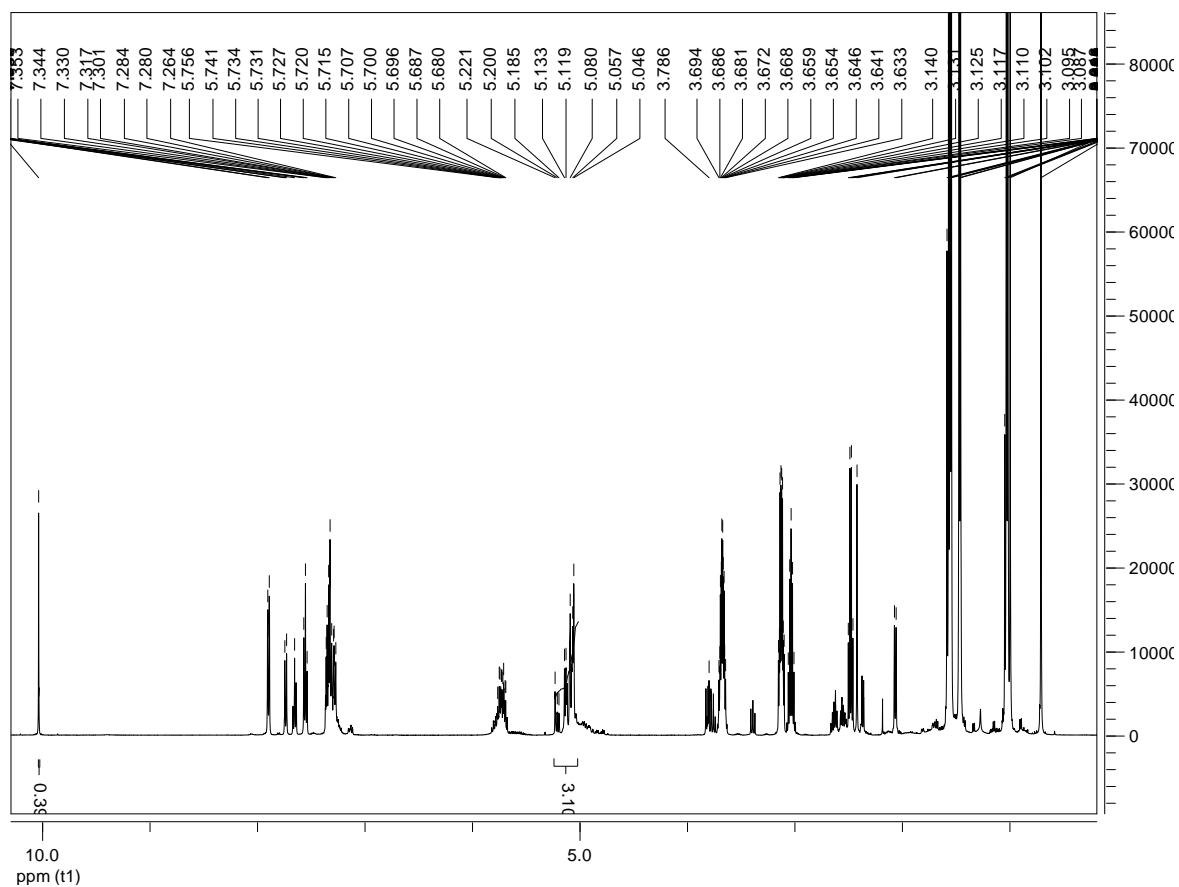

## References

1. D. D. Perrin, W. L. F. Armarego and D. R. Perrin, *Purification of Laboratory Chemicals*; Pergamon: New York, 1981.
2. D. Ghosh, D. Sahu, S. Saravanan, S. H. R. Abdi, B. Ganguly, N. H. Khan, R. I. Kureshy and H. C. Bajaj, *Org. Biomol. Chem.*, 2013, **11**, 3451–3460.
3. Z. Li, B. Plancq and T. Ollevier, *Chem. Eur. J.*, 2012, **18**, 3144–3147.
4. P. Jain and J. C. Antilla, *J. Am. Chem. Soc.*, 2010, **132**, 11884–11886.
5. A. V. Malkov, L. Dufková, L. Farrugia and P. Kočovský, *Angew. Chem. Int. Ed.*, 2003, **42**, 3674–3677.
6. J. F. Traverse, Y. Zhao, A. H. Hoveyda and M. L. Snapper, *Org. Lett.*, 2005, **7**, 3151–3154.
